# DORGE: Discovery of Oncogenes and Tumor Suppressor Genes Using Genetic and Epigenetic Features

## Authors

Jie Lyu<sup>1\*</sup>, Jingyi Jessica Li<sup>2\*†</sup>, Jianzhong Su<sup>3</sup>, Fanglue Peng<sup>3</sup>, Yiling Chen<sup>2</sup>, Xinzhou Ge<sup>2</sup> and Wei Li<sup>1†</sup>

\*These authors contributed equally to this work

†Corresponding author. Email: [wei.li@uci.edu](mailto:wei.li@uci.edu) (W.L.) or [jli@stat.ucla.edu](mailto:jli@stat.ucla.edu) (J.J.L.)

## Affiliations

<sup>1</sup> Division of Computational Biomedicine, Department of Biological Chemistry, School of Medicine, University of California, Irvine, CA 92697, USA

<sup>2</sup> Department of Statistics, University of California, Los Angeles, CA 90095, USA

<sup>3</sup> Department of Molecular and Cellular Biology, Baylor College of Medicine, Houston, TX 77030, USA

## Abstract

Comprehensive data-driven discovery of cancer driver genes, including tumor suppressor genes (TSGs) and oncogenes (OGs), is imperative for cancer prevention, diagnosis, and treatment. Although epigenetic alterations are important contributors to tumor initiation and progression, most known driver genes were identified based on genetic alterations alone, and it remains unclear to what the extent epigenetic features would facilitate the identification and characterization of cancer driver genes. Here we developed a prediction algorithm DORGE (Discovery of Oncogenes and tumor suppressor genes using Genetic and Epigenetic features), which integrates the most comprehensive collection of tumor genetic and epigenetic data to identify TSGs and OGs, particularly those with rare mutations. DORGE identified histone modifications as strong predictors for TSGs, and it found missense mutations, super enhancer percentages, and methylation differences between cancer and normal samples as strong predictors for OGs. We extensively validated novel cancer driver genes predicted by DORGE using independent functional genomics data. We also found that the dual-functional genes, which are both TSGs and OGs predicted by DORGE, are enriched at hubs in protein-protein interaction and drug-gene networks. Overall, our study has deepened the understanding of epigenetic mechanisms in tumorigenesis and revealed a previously undetected repertoire of cancer driver genes.

36

## 37 **Introduction**

38 Cancer results from an accumulation of key genetic alterations that disrupt the balance between cell  
39 division and apoptosis (1). Genes with “driver” mutations that affect cancer progression are known as  
40 cancer driver genes (2), which can be classified as tumor suppressor genes (TSGs) and oncogenes (OGs)  
41 based on their roles in cancer progression (3). OGs are usually activated by gain-of-function (GoF)  
42 mutations that stimulate cell growth and division, whereas TSGs are inactivated by loss-of-function (LoF)  
43 mutations (frameshift insertions/deletions and nonsense mutations) that block TSG functions in inhibiting  
44 cell proliferation, promoting DNA repair, and activating cell cycle checkpoints.

45 CRISPR (Clustered Regularly Interspaced Short Palindromic Repeats)-Cas9 screens with libraries of  
46 single-guide RNAs (sgRNAs) are powerful tools for identifying genes essential for cancer cell fitness,  
47 such as cancer cell growth and viability. For example, recent CRISPR screens by the Wellcome Sanger  
48 Institute detected 628 priority targets in 324 human cell lines from 30 cancer types (4). However, the  
49 genes identified by CRISPR screens in cell lines, which differ vastly from primary cells, may not be  
50 physiologically relevant to human biology and disease. Indeed, many well-known cancer driver genes in  
51 the Cancer Gene Census (CGC) database (5) were missing in CRISPR-screening results. They might have  
52 phenotypic effects in animal models that are not included in the current CRISPR screens.

53 Hence, it is necessary to predict cancer driver genes based on patient genomics data. Cancer genome  
54 sequencing efforts, such as the Cancer Genome Atlas (TCGA) (6), have generated an unprecedentedly  
55 large data resource and enabled the development of bioinformatics algorithms to discover cancer driver  
56 genes. Tokheim *et al.* (7) reviewed eight major algorithms, and Bailey *et al.* (8) integrated 26  
57 computational tools in a pan-cancer mutation study. These algorithms mainly look for cancer driver genes  
58 with greater than expected background mutational rates, and they output a ranked list of candidate genes  
59 based on a small collection of genetic features such as somatic mutations and copy number alterations  
60 (CNAs). Notably, Tumor Suppressor and Oncogene Explorer (TUSON) (9) and the 20/20+ machine-  
61 learning method (7) are the two major algorithms that can distinguish between protein-coding TSGs and  
62 OGs based on distinct patterns of mutational signatures.

63 However, a recent meta-analysis indicated that, over the next ten years, even if all available tumor  
64 genomes were analyzed, many cancer driver genes would remain undetected due to the lack of distinction  
65 between driver mutations and background mutational load (10). In addition, emerging evidence suggests  
66 that genetic alterations alone are insufficient to explain all cancer driver genes, including some well-  
67 known ones. For example, sustained expression of estrogen receptor- $\alpha$  (*ESR1*) drives two-thirds of breast  
68 cancers, but *ESR1* mutations that alter transcription levels occur in only 7% of *ESR1*-positive tumors (11).  
69 Furthermore, many pediatric tumors have extremely low mutation rates; some even appear to have no  
70 significant recurrent somatic mutations (12). Thus, it is likely that other mechanisms, such as epigenetic  
71 alterations, are responsible for the dysregulation of a large subset of cancer driver genes.

72 For example, tri-methylation on histone H3 lysine 4 (H3K4me3) and DNA methylation are the most  
73 extensively studied epigenetic modifications that influence gene expression and cell fate. H3K4me3 is a  
74 widely-recognized marker of active promoters and regulates the pre-initiation-complex formation and  
75 gene activation (13). More than 80% of promoters containing H3K4me3 are transcribed (14), and  
76 H3K4me3 is also involved in pre-mRNA splicing, recombination, DNA repair, and enhancer function.  
77 DNA methylation occurs in 70–80% of CpGs in a normal genome (15). H3K4me3 and CpG methylation  
78 alteration are associated with disease initiation, including many types of cancer (16). In particular,  
79 promoter hypermethylation that silences TSGs is a key epigenetic event in tumorigenesis (17), whereas  
80 gene-body methylation is positively correlated with gene expression (18). Recently, the “broad epigenetic  
81 domain” has emerged as a new concept in the control of cancer development. In an integrative analysis of  
82 1,134 genome-wide ChIP-seq datasets (19) from the Encyclopedia of DNA elements (ENCODE) project

83 (20), we found that broad H3K4me3 is a unique epigenetic signature of TSGs. In contrast to the common  
84 sharp (e.g., <1-kb width) H3K4me3 peaks associated with increased transcriptional initiation, broad  
85 H3K4me3 peaks are associated with increased transcriptional elongation. In addition, we also found many  
86 wide gene-body regions that are lowly methylated in normal tissues (the regions called “gene-body  
87 methylation canyons”) as hypermethylated in cancer (21). Gene-body methylation canyons are  
88 surprisingly enriched in OGs, and their hypermethylation directly induces OG activation (21).

89 Nevertheless, to the best of our knowledge, none of the existing bioinformatics algorithms sufficiently  
90 leveraged epigenetic features to predict cancer driver genes, despite the fact that epigenetic alterations are  
91 known to be associated with cancer driver genes. Therefore, these algorithms were not fully empowered,  
92 and there is a pressing need for a computational algorithm that integrates epigenetic data with genetic  
93 alterations to improve the prediction of cancer driver genes.

94 To address this need, we developed DORGE (Discovery of Oncogenes and tumor suppressor genes using  
95 Genetic and Epigenetic features). DORGE includes two prediction algorithms: DORGE-TSG for  
96 predicting TSGs and DORGE-OG for predicting OGs; both algorithms are elastic-net-based logistic  
97 regression classifiers trained on CGC genes and neutral genes. By evaluating DORGE-TSG and DORGE-  
98 OG, we found a surprisingly large contribution of histone modification to TSG prediction, as well as  
99 crucial roles of the features such as missense mutations, genomics, super enhancer percentages, and  
100 hypermethylation in predicting OGs. Cancer driver genes predicted by DORGE include known cancer  
101 driver genes and novel ones that have not been reported in the literature. We evaluated these novel cancer  
102 driver genes using multiple genomics and functional genomics datasets. In addition, we found that the  
103 novel dual-functional genes, which DORGE predicted as both TSGs and OGs, are highly enriched at hubs  
104 in protein-protein interaction (PPI) and drug/compound-gene networks.

## 105 Results

### 106 **DORGE predicts TSGs and OGs based on known cancer driver genes and neutral genes**

107 We developed a computational tool DORGE, by integrating extensive genomic and epigenomic datasets,  
108 for predicting cancer driver genes, i.e., TSGs and OGs. Briefly, we used CGC genes and 75 curated  
109 candidate features to train two binary classification algorithms: DORGE-TSG and DORGE-OG, which we  
110 subsequently applied to every gene to predict its probability of being a TSG and OG, respectively. Finally,  
111 we used the predicted probabilities to rank genes genome-wide and identified the top-ranked genes as  
112 candidate TSGs and OGs.

113 Prediction of cancer driver genes is a classification problem. It requires a high-quality training dataset that  
114 contains reliable TSGs, OGs, and the genes unlikely to be TSGs or OGs. Our two positive-training gene  
115 sets include 242 TSGs and 240 OGs (with dual-functional genes removed) from the CGC database v.87.,  
116 which we refer to as CGC-TSGs and CGC-OGs hereafter. The negative-training gene set includes 4,058  
117 neutral genes (NGs) reported to have no cancer relevance (9). To allow for the prediction of dual-  
118 functional genes that are both a TSG and an OG, we trained two classifiers for predicting TSGs and OGs,  
119 respectively.

120 To develop DORGE, we constructed 75 features that are likely predictive of cancer driver genes based on  
121 the literature. These features have either known roles in TSG/OG disruption (e.g., DNA methylation,  
122 somatic mutations) or potential links to TSG/OG functions (e.g., CRISPR-screening data) (Data file S1).  
123 We categorized these features into four major types: (I) 33 mutational features from two well-known  
124 cancer driver gene prediction algorithms—TUSON (9) and 20/20+ (7)—and gnomAD; 28 out of these 33  
125 features were compiled by TCGA (6) and Catalogue Of Somatic Mutations in Cancer (COSMIC) (5) from  
126 the mutation data of patient samples; (II) 12 genomic features including three from 20/20+ (7) and nine  
127 features (e.g., gene lengths and genome-evolution-related features) that have not been previously used to  
128 predict cancer driver genes (22); (III) 27 epigenetic features, including histone modifications from the  
129 ENCODE project (20), promoter and gene-body methylation features from the COSMIC database, and  
130 super enhancer percentages from the dbSUPER database (23); (IV) three phenotypic features, including  
131 CRISPR-screening data from the DepMap project (24), Variant Effect Scoring Tool (VEST) scores from  
132 20/20+ (7), and gene expression Z-scores from TCGA.

133 To train classifiers for TSG and OG prediction, we compared eight classification algorithms: logistic  
134 regression (LR), LR with the lasso penalty, LR with the ridge penalty, LR with the elastic net penalty,  
135 random forests, support vector machines (SVM) with the linear kernel, SVM with the Gaussian kernel,  
136 and XGBoost (<https://github.com/dmlc/xgboost>). For each algorithm, we considered three class ratios  
137 (where a class ratio was defined as the number of NGs to the number of CGC-TSGs or CGC-OGs): the  
138 original ratio, 5:1, and 1:1; for the latter two ratios, we randomly divided NGs into partitions so that the  
139 number of NGs in each partition approximately met the ratio given the number of CGC-TSGs or CGC-  
140 OGs. Considering the imbalance between NGs and CGC-TSGs/CGC-OGs in sizes, we used the 5-fold  
141 cross validated (CV) area under the precision-recall curve (AUPRC), instead of the receiver operating  
142 characteristic curve, as the accuracy measure to compare these eight classification algorithms under the  
143 three class ratios. Our comparison result showed that downsampling the NGs to have more balanced class  
144 ratios as 5:1 and 1:1 did not improve the accuracy achieved by the original class ratio. Hence, we decided  
145 to keep the original class ratio and found that LR with the lasso, LR with the ridge, LR with the elastic net,  
146 and random forests performed the best with similar AUPRC values (Data file S2). We chose LR with the  
147 elastic net as the classification algorithm for its good interpretability and its capacity for selecting  
148 correlated, informative features. Then we trained LR with the elastic net separately for TSG and OG  
149 prediction and subsequently used the two trained algorithms to assign every gene a TSG-score and an OG-  
150 score, both ranging from 0 to 1, with a larger value indicating a higher chance of the corresponding gene  
151 being a TSG or an OG. To decide appropriate thresholds on the TSG-scores and OG-scores for final  
152 predictions, we weighted the severity of mispredicting NGs as TSGs/OGs (i.e., making false positive

153 predictions) versus the other way around and set a target false positive rate (FPR) of 1%. Finally, we used  
154 the Neyman-Pearson classification algorithm (25) to set thresholds on the TSG-scores and OG-scores by  
155 respecting our target FPR and obtained two classifiers: DORGE-TSG and DORGE-OG for predicting  
156 TSGs and OGs, respectively.

157 Next we identified the important features for TSG and OG prediction. Because many features are  
158 correlated (Data file S1), the feature coefficients estimated by LR with the elastic net are not biologically  
159 interpretable measures of feature importance. The reason is that if one adds to the training data a feature  
160 that is highly correlated with an existing feature, the estimated coefficient of the existing feature would  
161 become less significant. This phenomenon contradicts our biological interpretation of feature importance:  
162 if a feature is important, its importance should not be diluted by the addition of another feature. Yet we are  
163 still interested in the importance of features in our final multi-feature linear classifier, so marginal feature  
164 importance based on each feature alone does not suffice. To address this issue, we proposed a simple two-  
165 step procedure: (1) we clustered features into feature groups that were approximately uncorrelated with  
166 one another; (2) we evaluated the importance of each feature group by the reduction in the 5-fold CV  
167 AUPRC when that feature group was left out, i.e., the contribution of that feature group to the 5-fold CV  
168 AUPRC given all the other feature groups. Our simple but innovative approach is advantageous in three  
169 aspects. First, by grouping correlated features we can interpret a small number of feature groups, each of  
170 which has a distinct biological interpretation, instead of a large number of features. Second, making  
171 feature groups approximately uncorrelated has a desirable consequence: if a new feature were added, it  
172 would either be added to an existing feature group or create a new feature group by itself (if it is  
173 approximately uncorrelated with any existing features); then its addition would barely affect the  
174 importance of the feature groups it is not in, as uncorrelated features would not affect each other's  
175 importance in a multi-feature linear classifier. Third, the same criterion, 5-fold CV AUPRC, was used to  
176 select a classification algorithm and define the importance of a feature group, making the analysis self-  
177 consistent. Using this approach, we first divided all 75 features into 20 feature groups by hierarchical  
178 clustering with complete linkage so that features within each group have pairwise absolute Pearson  
179 correlations at least 0.1 (Data file S2). Then we ranked the 20 feature groups by their contributions to 5-  
180 fold CV AUPRC and selected the top-ranked groups as those whose contributions exceeded 0.005. This  
181 gave us three and five feature groups for predicting TSGs and OGs, respectively.

182 Analyzing these top predictive feature groups, we found that multiple histone modification features stood  
183 out as the most predictive group (whose contribution to 5-fold CV AUPRC was almost 10-fold of that of  
184 the second most predictive group containing phenotype features) for TSGs, and that missense mutations  
185 constituted the top feature group for predicting OGs (Fig. 1A and B). Besides, epigenetic features  
186 including super enhancer and promoter and gene-body cancer-normal methylation differences were  
187 among the top feature groups for predicting OGs (Fig. 1B). We also found histone modifications and  
188 missense mutations among the top predictive features for both TSGs and OGs (Fig. 1A and B), suggesting  
189 that TSGs and OGs share certain features, whose predictive power for TSGs and OGs may be different  
190 though. For each feature within a top-ranked TSG (or OG) feature group, we compared its values in the  
191 CGC-TSGs (or CGC-OGs) and the NGs by the two-sided Wilcoxon rank-sum test, and the resulting -  
192  $\log_{10}P$ -value was shown in Fig. 1A and B.

193 We further examined several features in terms of their individual, marginal power of distinguishing CGC-  
194 TSGs and CGC-OGs from NGs. Indeed, multiple features are marginally strong predictors of TSGs, as  
195 they have significantly higher values in CGC-TSGs than in NGs. They include epigenetic features such as  
196 H3K4me3 peak length and height (Fig. 1C and Fig. S1A) and H3K79me2 peak length and height (Fig.  
197 S1B and S1C), missense mutational features such as non-silent/silent ratio (Fig. S1D), and phenotype  
198 features such as Variant Effect Scoring Tool (VEST) score (Fig. 1D). Many features also have  
199 significantly higher values in CGC-OGs than in NGs. They include missense mutational features such as  
200 missense damaging/benign ratio (Fig. 1E), missense entropy (Fig. 1F), probability of being loss-of-  
201 function intolerant (pLI) score (Fig. 1G) and LoF o/e constraint (Fig. S1E), genomics features such as



202 evolutionary conservation phastCons score and non-coding Genomic Evolutionary Rate Profiling  
203 (ncGERP) score (Fig. S1F and S1G), and epigenetic features such as super enhancer percentage in cell-  
204 lines (Fig. 1H). In particular, our finding agrees with previous studies in that missense damaging/benign  
205 ratio (reflecting the functional impact of missense mutations) and missense entropy (representing the  
206 enrichment of mutations in few residues) (9) have significantly higher values in CGC-OGs than in CGC-  
207 TSGs and NGs (Fig. 1E and F). Interestingly, VEST and PolyPhen-2 scores, both of which reflect  
208 functional effects of mutations, have significantly higher values in CGC-TSGs and CGC-OGs than in NGs,  
209 and they do not exhibit statistically significant differences between CGC-TSGs and CGC-OGs (Fig. 1D  
210 and S1H). Notably, we found super enhancer, a commonly regarded OG-specific feature (26), also  
211 characteristic of TSGs, as it has significantly higher values in CGC-TSGs than in NGs (Fig. 1H).

212 We note that, besides H3K4me3 peak length, a readily known TSG predictor, peak lengths of four more  
213 histone marks (H3K79me2, H3K36me3, H4K20me1, and H3K9ac) are also significantly larger in CGC-  
214 TSGs than in CGC-OGs and NGs (Fig. S1B, S1I, S1J, and S1K), consistent with the fact that the  
215 activation of TSGs is associated with transcriptional elongation (19, 27-29). To further verify the  
216 enrichment of broad H3K4me3 peaks in CGC-TSGs, we performed the Fisher's exact test on a two-by-  
217 two contingency table, whose two rows correspond to CGC-TSGs and all the other genes in the training  
218 data (CGC-OGs and NGs) and whose two columns correspond to the genes with broad H3K4me3 peaks  
219 (whose mean lengths across ENCODE samples > 4 kb) and the rest of genes. We similarly performed two  
220 more Fisher's exact tests to check the enrichment of broad H3K4me3 peaks in CGC-OGs and NGs but  
221 found much lower enrichment in these two gene groups than in CGC-TSGs, confirming that H3K4me3 is  
222 a distinctive feature of TSGs (Fig. S1L). Taken together, we identified histone modifications as the top  
223 predictors for TSGs. We found missense mutations, super enhancer percentages, and methylation  
224 differences between cancer and normal samples as major predictors for OGs. It is worth noting that  
225 histone modifications and missense mutations are also important features for predicting OGs and TSGs,  
226 respectively, though to a lesser extent. In summary, DORGE can successfully leverage public data to  
227 discover the genetic and epigenetic alterations that play significant roles in cancer driver gene  
228 dysregulation. Fig. S2 provides an overview of the DORGE method and the evaluations in the following  
229 sections.

230

### 231 **Evaluation of the prediction accuracy of DORGE**

232 As we described earlier, DORGE-TSG and DORGE-OG output TSG-scores and OG-scores for predicting  
233 TSGs and OGs, respectively. Every gene received a TSG-score and an OG-score, both ranging from 0 to 1,  
234 and a higher TSG-score (or OG-score) indicates a higher probability of a gene being a TSG (or an OG)  
235 (Materials and Methods). DORGE thresholded the TSG-scores and OG-scores by the Neyman-Pearson  
236 classification algorithm (25) with a target FPR of 1%, leading to 925 predicted TSGs, whose TSG-scores  
237 exceeded 0.6233374, and 683 predicted OGs, whose OG-scores exceeded 0.6761319. In total, DORGE  
238 predicted 1,172 cancer driver genes, including 436 dual-functional genes (Fig. 2A; the predicted genes are  
239 listed in Data file S2). We note that these predicted TSGs and OGs are conservative predictions guided by  
240 the small FPR threshold 1%, as reflected by the fact that their numbers are smaller than the numbers of  
241 previously predicted cancer driver genes—1,217 TSGs and 803 OGs in databases TSGene (30) and  
242 ONGene (31) (by June 18, 2020). If DORGE users would like to be less conservative and predict more  
243 TSGs and OGs, they can opt for a higher FPR threshold such as 5%. Next, we filtered out CGC genes  
244 from the DORGE-predicted cancer driver genes and defined the remaining 725 predicted TSGs and 515  
245 predicted OGs as DORGE-predicted novel genes (Data file S1), among which 537 novel TSGs were not  
246 included in the CancerMine (32) or TSGene database (Fig. 2B), and 306 novel OGs were not found in the  
247 CancerMine or ONGene database (Fig. 2C).

248 We evaluated DORGE-TSG and DORGE-OG by their overall prediction accuracy and found that they  
249 achieved high 5-fold CV AUPRC of 0.821 and 0.766, respectively, when trained with all the 75 features  
250 (Fig. 2D and 2E). Considering that previous algorithms primarily relied on genetic features to predict

251 cancer driver genes, we evaluated the accuracy gain of DORGE from including epigenetic and phenotypic  
252 features. To this end, we constructed variants of DORGE-TSG and DORGE-OG based on each of the  
253 following feature subsets: ‘Mutation’, ‘Genomics’, ‘Phenotype’, ‘Epigenetics’, and their complements  
254 (i.e., the subsets resulting from subtracting each of the four feature subsets from the 75 features), as well  
255 as TUSON and CRISPR-screening-only features (Data file S1, Fig. 2D and E). For each of these DORGE-  
256 TSG and DORGE-OG variants, we calculated its 5-fold CV AUPRC.

257 Based on feature subsets ‘Mutation’, ‘Genomics’, ‘Phenotype’, and ‘Epigenetics’, the corresponding  
258 DORGE-TSG variants achieved 5-fold CV AUPRC of 0.638, 0.314, 0.358, and 0.600, respectively. In  
259 parallel, based on the complements of ‘Mutation’, ‘Genomics’, ‘Phenotype’, and ‘Epigenetics’ (i.e., when  
260 features in each subset were excluded), the corresponding DORGE-TSG variants achieved 5-fold CV  
261 AUPRC of 0.692, 0.819, 0.820, or 0.715. These results consistently show the large contributions of  
262 ‘Mutation’ and ‘Epigenetics’ features to TSG prediction (Fig. 2D). Furthermore, using the features in the  
263 TUSON method and the CRISPR-screening-only feature, the corresponding DORGE-TSG variants only  
264 achieved 5-fold CV AUPRC of 0.500 and 0.156, much lower than 0.821 achieved by DORGE-TSG with  
265 all the 75 features. Similarly, we compared DORGE-OG with its variants trained on feature subsets.  
266 Specifically, DORGE-OG variants that only used ‘Mutation’, ‘Genomics’, ‘Phenotype’, or ‘Epigenetics’  
267 features achieved 5-fold CV AUPRC of 0.660, 0.299, 0.241, or 0.295; when each of these feature subsets  
268 was excluded, the AUPRC correspondingly became 0.453, 0.752, 0.763, or 0.705. These results suggest  
269 that ‘Mutation’ features have a large contribution to OG prediction (Fig. 2E). Similar to DORGE-TSG, the  
270 DORGE-OG variants trained with TUSON features or the CRISPR-screening-only feature had much  
271 lower prediction accuracy (5-fold CV AUPRC of 0.534 or 0.089) than that of DORGE-OG trained with all  
272 the 75 features (5-fold CV AUPRC of 0.766). The fact that DORGE-TSG and DORGE-OG outperformed  
273 all their variants confirms that DORGE effectively leveraged the 75 features and did not suffer from  
274 overfitting in its TSG and OG prediction.

275 The above results also reveal that the CRISPR-screening-only feature did not have a high predictive  
276 power on its own, as shown by its low 5-fold CV AUPRC (0.156 and 0.089) in TSG and OG prediction.  
277 Moreover, under the target FPR of 1%, the DORGE-TSG and DORGE-OG variants with the CRISPR-  
278 screening-only feature identified only 16 (5.1%) CGC-TSGs and 3 (1.0%) CGC-OGs, whereas DORGE-  
279 TSG and DORGE-OG with all the 75 features recovered additional 184 (58.8%) CGC-TSGs and 165  
280 (53.1%) CGC-OGs (Fig. 2F). These results challenge a common belief that CRISPR screening using cell  
281 lines is powerful for discovering cancer driver genes. A possible reason for our results is that cell lines do  
282 not well mimic *in vivo* cancer cells. These additional cancer driver genes with all the 75 features might  
283 have phenotypic effects in animal models that are not included in the current CRISPR screens

284 We next evaluated the distinct predictive power provided by epigenetic features to cancer driver gene  
285 prediction. Inspecting the distributions of TSG-scores and OG-scores, we found that many top-ranked  
286 CGC genes were not predictable by DORGE without epigenetic features (Fig. 2G and H). In detail, 52  
287 (16.61%) CGC-TSGs and 26 (8.36%) CGC-OGs would have been missed by DORGE-TSG and DORGE-  
288 OG, respectively, at the target FPR 1% if epigenetic features were not included. These results suggest that  
289 (I) epigenetic features empowered the discovery of cancer driver genes; and (II) epigenetic features  
290 empowered DORGE-TSG more than DORGE-OG because the number of rescued CGC-TSGs (52) is  
291 twice the number of rescued CGC-OGs (26).

292 We then searched biomedical literature for the top-15 novel TSGs and OGs ranked by DORGE. Out of  
293 these top novel genes, 10 TSGs and 12 OGs have reported tumor suppressive and oncogenic functions,  
294 respectively (Fig. 2I). We also inspected these top novel genes for selected representative features and  
295 confirmed that they indeed have high values in the top predictive TSG features (H3K4me3 peak length,  
296 nonsilent/silent ratio, VEST score, and conservation phastCons score) and OG features (missense entropy,  
297 super enhancer percentage, pLI score, ncGERP score, and gene-body cancer-normal methylation  
298 difference) selected from the top feature groups (Fig. 2I). We further confirmed this result in the subset of

299 top novel genes that are not in the CancerMine, TSGene, and ONGene databases (Fig. 2J). In particular,  
300 nearly all of the top novel TSGs have broad H3K4me3 peaks, and most of the top novel OGs are  
301 hypermethylated in gene-body (with positive cancer–normal methylation differences).

### 302 **Benchmarking DORGE against existing algorithms**

303 We further compared DORGE with ten existing algorithms for cancer driver gene prediction using four  
304 accuracy measures—sensitivity ( $Sn$ ), specificity ( $Sp$ ), precision, and overall accuracy—all based on CGC  
305 genes (Table 1). We did not include the five-test model (RF5) because even though it outputs TSG and  
306 OG probabilities, it does not have explicit cutoffs for defining TSGs and OGs (33). We found that  
307 DORGE performed the best in all these measures except  $Sp$ , for which DORGE was 0.997 and the best  
308 algorithm 20/20+ was 1.000. The superiority of DORGE was most obvious in  $Sn$ , where its top  
309 performance (0.611) was followed with a large gap by OncodriveFM (0.338) (34), MuSIC (0.331) (35),  
310 and MutPanning (0.318) (36) (Table 1). To further confirm that DORGE outperformed these ten  
311 algorithms, we performed a similar comparison based on 1,056 OncoKB cancer genes (37), which had  
312 been widely used to benchmark cancer gene prediction. Consistent with the CGC gene evaluation results,  
313 DORGE achieved the best performance in  $Sn$  (almost 50% higher than that of the second best algorithm  
314 OncodriveFM) and overall accuracy, the third best performance in  $Sp$  (0.997 vs. 0.999 of the best method  
315 TUSON), and the second best performance in precision (0.973 vs. 0.993 of the best method 20/20+,  
316 whose  $Sn$  was only 32% of that of DORGE) (Data file S2). Taken together, our benchmark results show  
317 that DORGE made a significant advance in improving cancer driver gene prediction from existing  
318 algorithms.

319 Based on CGC-TSGs and CGC-OGs, we further benchmarked DORGE against 20/20+, TUSON, and  
320 GUST for separate prediction of TSGs and OGs (Data file S2). We did not include the other seven  
321 algorithms because they could not predict TSGs and OGs separately. Consistent with our previous results,  
322 DORGE exhibited much higher  $Sn$  than the other three algorithms did (DORGE had  $Sn$  of 0.639 and 0.54  
323 for predicting TSGs and OGs, while the best  $Sn$  of the other three algorithms was only 0.252 and 0.116),  
324 and it also achieved the best precision and overall accuracy; all the four algorithms had close to perfect  $Sp$ .  
325 Although the high  $Sn$  of DORGE seemed to be due to the fact that 20/20+, TUSON, and GUST by default  
326 predicted fewer TSGs and OGs than DORGE did, it was not the case. After we adjusted the thresholds of  
327 20/20+ and TUSON so that they predicted the same numbers of TSGs and OGs as DORGE did (the  
328 GUST software does not allow such threshold adjustment), the  $Sn$  of 20/20+ and TUSON, though  
329 increased, remained almost one-fold lower than that of DORGE. Collectively, our results suggest that  
330 DORGE outperformed 20/20+, TUSON, and GUST in both TSG and OG prediction.

331 We also compared DORGE with TUSON and 20/20+ in terms of their predicted ranking of CGC-TSGs  
332 and CGC-OGs. For example, if an algorithm predicted gene A more likely than gene B to be a TSG, we  
333 say that gene A received a smaller TSG rank than gene B did. Accordingly, we calculated a TSG rank and  
334 an OG rank for every CGC gene by each algorithm. Among the CGC genes, we define the core CGC-  
335 TSGs and core CGC-OGs as those that were annotated solely as TSGs and OGs, not both (dual-  
336 functional), in CGC v.77. Compared to the genes that were added later to CGC v.87, these core CGCs  
337 have been more extensively studied. Then we examined the ranking consistency between DORGE and the  
338 other two algorithms for CGC genes and the core CGC genes. For CGC-TSGs, we found that their TSG  
339 ranks by DORGE had strong positive correlations with their TSG ranks by TUSON and 20/20+ (Fig. S3A  
340 and S3B), and overall they were ranked more top by DORGE than by the other two algorithms (Fig. S3E).  
341 We observed similar results for CGC-OGs (Fig. S3C, S3D, and S3G). The conclusions also held for core  
342 CGC genes (Fig. S3F and S3H). These results confirm that DORGE predictions are more biologically  
343 relevant than those of TUSON and 20/20+. For example, *ELL* (elongation factor for RNA polymerase II),  
344 a CGC-TSG, was ranked 190-th by DORGE-TSG, 8,144-th by TUSON, and 3,958-th by 20/20+; *PDGFB*  
345 (platelet derived growth factor subunit B), a CGC-OG, was ranked 207-th by DORGE, 2,753-th by  
346 TUSON, and 4,982-th by 20/20+. Also, DORGE ranked CGC dual-functional genes better than TUSON



347 and 20/20+ did, as exemplified by the dual-functional gene *IDH1* (isocitrate dehydrogenase (NADP(+)) 1),  
348 which was ranked first for TSG and 28-th for OG by DORGE, 18,734-th for TSG and 2,092-th for OG by  
349 TUSON, and 14,936-th for TSG and 13-th for OG by 20/20+.

350

### 351 **Functional evaluation of novel cancer driver genes and those unpredictable without epigenetics** 352 **features**

353 Even though DORGE predicted many more cancer driver genes than TUSON, 20/20+, and GUST did—  
354 DORGE, TUSON, 20/20+, and GUST predicted 1,172, 243, 193, and 276 cancer driver genes,  
355 respectively, DORGE achieved the highest overall prediction accuracy based on CGC genes. After  
356 confirming this, we further characterized the novel cancer driver genes, defined as those predicted by  
357 DORGE but not included in the CGC database.

358

359 We performed the Kyoto Encyclopedia of Genes and Genomes (KEGG) pathway analysis on the novel  
360 TSGs and OGs, and we found, as expected, that the novel TSGs are enriched with TSG-related pathways  
361 such as “apoptosis” and “focal adhesion” and that the novel OGs are enriched with OG-related pathways  
362 such as “cell cycle” and “TGF-beta signaling pathway” (Fig. 3A). However, without epigenetic features,  
363 the novel TSGs and OGs predicted by the DORGE-TSG and DORGE-OG variants are no longer enriched  
364 with certain TSG-related and OG-related pathways such as “TGF-beta signaling pathway” (Fig. S4A).  
365 These results again suggest that epigenetic features made unique contributions to discovering novel cancer  
366 driver genes. In addition, the degrees of enrichment ( $-\log_{10}P$ -values) of those shared enriched KEGG  
367 pathways, which were enriched in novel TSGs or OGs regardless of the inclusion of epigenetic features,  
368 are positively correlated, implying that the addition of epigenetic features did not prohibit the discovery of  
369 meaningful cancer driver genes (Fig. S4B and S4C).

370

371 Given that histone modification features (e.g., H3K4me3 peak length) empowered DORGE-TSG  
372 prediction, we sought experimental evidence for the novel TSGs that have broad histone modification  
373 (e.g., H3K4me3) peaks. A previous cell proliferation experiment observed increased cell growth after  
374 knocking down multiple potential TSGs whose H3K4me3 peaks have mean lengths (across ENCODE cell  
375 lines) greater than 2 kb (19), including two DORGE predicted novel TSGs—*CSRNP1* and *NR3C1B*.  
376 Another previous study found that *Mll4* loss downregulates potential TSG expression and weakens broad  
377 H3K4me3 peaks in mice (38). Examining the human orthologs of the six mouse potential TSGs  
378 downregulated by *Mll4* loss in that study, we found that four orthologs were ranked top by DORGE-TSG  
379 and have H3K4me3 peaks longer than 2 kb. These four human genes are *DNMT3A* (18-th), *BCL6* (96-th),  
380 *FOXO3* (222-th), and *CBFA2T3* (1,012-th).

381

### 382 **Characterization of DORGE-predicted novel TSGs and OGs by independent functional genomics** 383 **data**

384 We first used a published ATAC-seq dataset of TCGA pan-cancer samples (39) to characterize the  
385 DORGE-predicted novel cancer driver genes. ATAC-seq reveals gene accessibility and provides valuable  
386 information about the complex gene regulatory relationships. Based on this ATAC-seq dataset, we found  
387 that DORGE-predicted novel TSGs and OGs—consistent with that CGC-TSGs and CGC-OGs—are  
388 significantly more accessible than NGs (all with  $P = 2.22 \times 10^{-16}$  by the one-sided Wilcoxon rank-sum test)  
389 (Fig. 3B). This result established a connection between cancer driver genes and chromatin accessibility—  
390 both TSGs and OGs are ubiquitously accessible in cancer samples.

391 We then explored a possible relationship between cancer driver genes and epigenetic regulators (ERs),  
392 which are known to play fundamental roles in genome-wide gene regulation by reading or modifying  
393 chromatin states. A previous study suggested that most ERs are intolerant to LoF mutations (40), and our  
394 Fig. S1E also shows that LoF mutations (reflected by the LoF o/e constraint feature) are significantly

395 more abundant in TSGs and OGs than NGs, prompting us to explore whether ER genes have a significant  
396 overlap with cancer driver genes. By analyzing a curated list of 761 ERs, we found significant enrichment  
397 of CGC-TSGs and CGC-OGs ( $P = 3.14 \times 10^{-20}$  and  $9.36 \times 10^{-8}$  by the Fisher's exact test; in total, 94 CGC  
398 cancer driver genes are among the ERs, with  $P = 2.79 \times 10^{-13}$  by the Fisher's exact test) (Fig. 3C). This  
399 result also shows the greater enrichment of CGC-TSGs than that of CGC-OGs in ER genes, consistent  
400 with a previous study showing that the application of cancer gene classifiers to ER genes revealed more  
401 TSGs than OGs (41). Notably, similar to CGC genes, DORGE-predicted novel TSGs ( $P = 1.15 \times 10^{-6}$ ) are  
402 also more enriched than novel OGs ( $P = 2.65 \times 10^{-3}$ ) in ER genes (Fig. 3C).

403 We next evaluated DORGE-predicted novel TSGs using Sleeping Beauty (SB) screening data. The SB  
404 transposon is a type of synthetic DNA elements that can disrupt the expression of genes near its insertion  
405 sites, a process called insertional mutagenesis. Hence, the SB transposon is a screening tool for TSGs,  
406 whose expression disruption leads to carcinogenesis. To verify the novel TSGs, we downloaded the list of  
407 inactivating pattern genes from the Sleeping Beauty Cancer Driver Database (SBCDDDB) (42). As  
408 expected, we found that both CGC-TSGs ( $P = 5.41 \times 10^{-19}$ ) and DORGE-predicted novel TSGs ( $P = 5.11$   
409  $\times 10^{-24}$ ) are enriched in the list. In contrast, NGs have no enrichment. This result is consistent with our  
410 expectation that TSGs are inactivated in SB screens (Fig. 3D).

411 We further evaluated DORGE-predicted novel cancer driver genes using an shRNA screening dataset  
412 from the Achilles project (43), as shRNA screens for gene essentiality for cell proliferation in cell lines.  
413 Based on the dataset, the knockdown of DORGE-predicted novel OGs and CGC-OGs shows a greater  
414 decrease in cell proliferation rates compared to NGs (Fig. S4D). In contrast, the knockdown of DORGE-  
415 predicted novel TSGs and CGC-TSGs shows nearly no decrease in cell proliferation rates compared to  
416 NGs (Fig. S4D). This result is consistent with the prior knowledge that the proliferation of cell lines is  
417 dependent upon OGs (24).

418 Lastly, we evaluated DORGE-predicted novel cancer driver genes using patient survival data. In the  
419 precomputed survival data downloaded from the OncoRank website (44), every gene has a hazard ratio  
420 (HR, whose value  $>$ ,  $=$ , or  $<$  1 indicates that the gene's expression reduces, does not affect, or increases  
421 patients' survival time). We found that CGC-TSGs and DORGE-predicted novel TSGs have significantly  
422 lower HRs than OGs (CGC-OGs and DORGE-predicted novel OGs) and NGs in three representative  
423 cancer types: Rectum adenocarcinoma (READ), Colon adenocarcinoma (COAD), and Uterine Corpus  
424 Endometrial Carcinoma (UCEC) (Fig. 3E, S4E and S4F). These results are consistent with the fact that  
425 TSG expression prohibits cancer occurrence and prolongs survival, while OG expression has the opposite  
426 effects. The complete HRs and  $P$ -values of DORGE-predicted novel TSGs and OGs in 21 cancer types are  
427 available in Data file S1.

#### 428 429 **TSGs and OGs are conserved at both exons and non-coding regions**

430 Previous studies have suggested that evolutionarily conserved genes are enriched with cancer driver  
431 candidates and drug targets (45). Consistent with these studies, we observed statistically significant  
432 differences in exonic sequence conservation (phastCons and phyloP scores) between CGC-TSGs/OGs and  
433 NGs, and the same conclusion holds for DORGE-predicted TSGs and OGs (Fig. 3F and S4G). Compared  
434 to OGs, TSGs have slightly higher exonic sequence conservation (Fig. 3F and S4G).

435 We next explored the conservation of non-coding regions in cancer driver genes. Non-coding regions are  
436 characterized by positive non-coding Genomic Evolutionary Rate Profiling (ncGERP) values and negative  
437 non-coding Residual Variation Intolerance Score (ncRVIS) values. The reason is that ncGERP is a  
438 measure of nucleotide constraints and reflects conservation across the mammalian lineage (46) (Fig. S1G),  
439 while ncRVIS measures human-specific constraints (46). Based on these two measures, we found that  
440 TSGs (CGC-TSGs and DORGE-predicted novel TSGs) are slightly more conserved than OGs (CGC-OGs  
441 and DORGE-predicted novel OGs) at non-coding regions (Fig. S1G and Fig. S4H).

442

443 In summary, we found that cancer driver genes are more conserved than NGs at both exonic and non-  
444 coding regions. Between TSGs and OGs, we, for the first time to our knowledge, found that TSGs are  
445 more conserved at exons, while OGs are more conserved at non-coding regions.

446

### 447 **TSGs and OGs are overrepresented in ancient genes**

448 Motivated by our conservation results, we investigated the phyletic ages (i.e., evolutionary origins) of  
449 cancer driver genes. Although cancer driver genes are believed to be originated from Metazoa  
450 (multicellular animals) (47), the possibility of their origination from Eukaryota, an earlier evolutionary  
451 origin, has not been explicitly investigated. Based on the phyletic-age gene lists (from early to late:  
452 Eukaryota, Metazoa, Chordata, and Mammalia) from the Online GEne Essentiality (OGEE) database (48),  
453 we found significant enrichment of cancer driver genes in the Eukaryota gene list (Fig. 3G;  $P$ -values by  
454 the Fisher's exact test:  $P = 1.05 \times 10^{-3}$  for CGC-TSGs,  $P = 3.25 \times 10^{-13}$  for DORGE-predicted novel TSGs,  
455  $P = 1.41 \times 10^{-5}$  for CGC-OGs, and  $P = 2.77 \times 10^{-5}$  for DORGE-predicted novel OGs), in contrast to NGs.  
456 Our results indicate that cancer driver genes may be originated earlier in the evolutionary history than  
457 previously thought. In addition, we found that cancer driver genes were not enriched in young phyletic  
458 ages (Chordata and Mammalia) (Fig. 3G), consistent with a recent paper (49).

459

### 460 **Dual-functional cancer driver genes act as backbones in protein-protein interaction networks**

461 Previous studies have shown high interactivity of cancer driver genes in the BioGRID PPI network (9),  
462 and accordingly, PPI data have been used to identify cancer driver genes (50, 51). We, therefore, explored  
463 the extent to which DORGE-predicted TSGs and OGs are connected to other genes/proteins. When  
464 analyzing the whole BioGRID PPI network (Fig. 4A), we found that TSGs and OGs, including CGC  
465 genes and DORGE-predicted novel genes, exhibit significantly higher degrees, betweenness, and  
466 closeness centrality than NGs do (Fig. S5A–C). This result suggested that the removal or knockdown of  
467 cancer driver genes, as expected, will exert a critical impact on the whole PPI network. In particular, dual-  
468 functional driver genes as both TSGs and OGs display even higher interactivity than sole TSGs and OGs  
469 (Fig. S5A–C). Densely connected genes tend to form modules, and importantly, cancer driver gene  
470 modules can trigger the hallmarks of cancer and confer the proliferation advantages displayed on cancer  
471 cells (52). Here, we used the Molecular Complex Detection (MCODE) algorithm to identify six densely  
472 connected network modules/backbones (Fig. 4B) from the PPI subnetwork of the 1,172 DORGE-predicted  
473 cancer driver genes. Notably, the 64 genes that comprise the six identified modules are all dual-functional  
474 genes (8 CGC dual-functional genes and 56 DORGE-predicted novel dual-functional genes). This  
475 overrepresentation of dual-functional driver genes in network modules is unusual, as it is highly unlikely  
476 to obtain a 64-gene subnetwork comprised of all dual-functional genes ( $P = 6.66 \times 10^{-27}$  by the binomial  
477 test).

478 It was previously shown that somatic alterations often occur at PPI network hub genes in cancer (53), and  
479 these hub genes are typically essential genes. We, therefore, investigated the enrichment of cancer driver  
480 genes in the hub genes—the 978 genes (top 5%) with the highest degrees in the BioGRID PPI network.  
481 We found that all TSGs, OGs, and dual-functional genes (including CGC genes and DORGE-predicted  
482 novel genes) are enriched in the hub genes (Fig. 4C). Interestingly, the CGC and novel dual-functional  
483 genes are the most enriched (Fig. 4C). We also analyzed the enrichment of ten functional gene sets.  
484 Among these gene sets, we found that the genes with high missense o/e constraints (highest top 5%), the  
485 essential genes from the OGEE database, and the ER genes are most enriched in the hub genes (Fig. 4D).  
486 Previous literature has not reported any connection between ERs and PPI hub genes, and our finding  
487 strengthens the critical roles of ERs. We also found that the genes with broad H3K4me3 peaks are  
488 significantly enriched, to a similar degree as the housekeeping genes (HKGs), in the hub genes (Fig. 4D).

489

### 490 **Epigenetic regulator genes act as backbones in gene-drug networks**

491 Cancer driver gene prediction is the basis for the development of anti-cancer drugs and personalized  
492 cancer treatments. We, therefore, explored possible gene-drug relationships of DORGE-predicted cancer  
493 driver genes using the PharmacoDB, a gene-drug network constructed from comprehensive high-  
494 throughput cancer pharmacogenomic datasets. In the subnetwork containing CGC genes and DORGE-  
495 predicted novel genes, we found that these cancer driver genes are densely connected to anti-cancer drugs  
496 (Fig. S5D). Similar to our observation from the PPI network, we found that TSGs and OGs, including  
497 CGC genes and DORGE-predicted novel genes, exhibit significantly denser connections to drugs than  
498 NGs do (Fig. S5E).

499 We then identified the top-ten drugs with the largest numbers of connected genes in the PharmacoDB  
500 gene-drug network. Among these ten drugs, the top one is doxorubicin, a well-known chemotherapeutic  
501 agent, and the other nine drugs are also known anti-cancer drugs (Fig. S5F). We next identified 979 genes  
502 (top 5%) with the highest degrees in the gene-drug network as hub genes and found that DORGE-  
503 predicted novel driver genes are enriched in these hub genes (Fig. 4E). We also analyzed the enrichment  
504 of ten functional gene sets in these hub genes. Unlike their enrichment in our previously defined PPI  
505 network hub genes (Fig. 4D), the essential genes and the HKGs are not enriched in these gene-drug  
506 network hub genes (Fig. 4F), an expected result as their expression is required for normal cells and they  
507 are unlikely to be viable drug targets for cancer treatment. In contrast, we still observed the enrichment of  
508 three functional gene sets—the genes with high missense o/e constraints (highest top 5%), the ER genes,  
509 and the genes with broad H3K4me3 peaks—in the gene-drug network hub genes (Fig. 4F). Together with  
510 our PPI analysis, we conclude that the genes in these three functional gene sets may be potential  
511 actionable drug targets. To the best of our knowledge, there has been no report on the enrichment of the  
512 ER genes in gene-drug network hub genes. Our results from PPI and gene-drug network analysis  
513 emphasize the importance of studying the ER genes as potential drug targets.

#### 514 **Identification of candidate anti-cancer drugs from public transcriptomic data**

515 A bottleneck in novel anti-cancer drug discovery is an efficient selection of potential molecular targets for  
516 a drug/compound or its derivatives. Ideal anti-cancer drugs are those that upregulate TSGs and/or  
517 downregulate OGs. We used the CRowd Extracted Expression of Differential Signatures (CREEDS) data  
518 (54) to explore the relationship between CGC and DORGE-predicted genes and anti-cancer drugs (Data  
519 file S1). We identified 68 proven or potential anti-cancer drugs/compounds that were associated with 68  
520 target genes meeting the filtering criteria (limma  $Q$ -value < 0.05 and fold-change > 2) from the CREEDS  
521 data (Fig. S6). Notably, 54 (79.41%) of the 68 genes are DORGE-predicted novel TSG or OG genes.

522  
523 Recent pharmacological efforts suggested that drugs/compounds actionable toward more than one gene or  
524 molecular pathway are preferable for repurposing (55), and it is common for existing drugs to be later  
525 repurposed as anti-cancer drugs. For example, Dexamethasone was previously classified as a  
526 corticosteroid but later repurposed for cancer treatment. Among the 68 drugs/compounds we identified, 30  
527 are anti-cancer and chemotherapy drugs (Fig. S6, bottom), 23 have only been tested in laboratories and are  
528 not yet in clinical trials, and 15 have not been tested in cell lines (Fig. S6, bottom). Of the 38  
529 drugs/compounds not yet confirmed in anti-cancer clinical trials, many have been proven to treat other  
530 diseases. Overall, our results indicate that they are potential drugs for cancer treatment.

#### 531 532 **Discussion**

533 In this paper, we developed a machine-learning tool DORGE for identifying cancer driver genes by  
534 integrating genetic and epigenetic features. Our development is the first effort that goes beyond the use of  
535 tumor genetic alterations for cancer driver prediction, and it was motivated by our previous studies that  
536 found specific epigenetic patterns associated with TSGs or OGs (19, 21). Although experimental  
537 validation is needed for further studies, our computational evaluation verifies that the novel cancer driver  
538 genes predicted by DORGE resemble known cancer drivers in multiple aspects and have promises to be



539 potential therapeutic targets. In particular, the top-ranked novel cancer driver genes, especially those  
540 regulated by epigenetic mechanisms, warrant further detailed investigation.

541 Cancer driver genes that are infrequently mutated in cancer are often indistinguishable from passenger  
542 genes with random mutations in genome sequencing data. Such random mutations may result from  
543 technical reasons including tumor DNA contamination, sequencing depth, and mutation calling failure  
544 (56). Therefore, infrequently-mutated cancer driver genes are hardly detectable by the methods based on  
545 the mutational background model (MutSigCV (57)) or the functional impact model (OncodriveFML (58),  
546 OncodriveFM (34)) and OncodriveCLUST (59)). However, these genes may be identified through the  
547 integration of epigenetic, phenotypic and genomic data.

548 In previous studies, various non-mutational datasets have been used in cancer driver gene identification;  
549 however, unlike DORGE, existing work only used few or several non-mutational features extracted from  
550 these datasets (7, 50, 51, 57, 60, 61). For example, MutSigCV used DNA replication timing and cell line  
551 expression data (57); ActiveDriver used phosphorylation site information (61); 20/20+ used multi-species  
552 conservation, mutation pathogenicity scores, and replication timing (7). PPI networks and pathway  
553 knowledge have also been used to identify cancer driver genes (50, 51); however, these studies were  
554 biased toward well-studied genes/pathways and thus may overlook quite many genuine cancer driver  
555 genes. In contrast to all these studies, DORGE leverages epigenetic information without any bias towards  
556 gene selection to predict cancer driver genes, and this innovation makes DORGE outpower these existing  
557 work in discovering novel cancer driver genes.

558 We further note that the capacity of DORGE in predicting TSGs and OGs separately allows DORGE to  
559 identify novel dual-functional cancer driver genes. This is advantageous given that more and more dual-  
560 functional cancer driver genes have been identified in the literature. In this study, we found a unique  
561 property of dual-functional cancer driver genes: they have more connecting partners in PPI and drug-gene  
562 networks than other driver genes have. This property, to our knowledge, was not previously reported. In  
563 fact, several novel dual-functional genes predicted by DORGE drew our attention. For example, *PTEN*  
564 (*Phosphatase and tensin Homolog*), a protein phosphatase, is commonly regarded as a TSG; however,  
565 DORGE predicted it as an OG as well. We found that, indeed, oncogenic roles were reported for *PTEN* in  
566 a few studies. One explanation for the dual-functional roles of *PTEN* is that its oncogenic effect depends  
567 on the positions of mutations (62). We confirmed this by analyzing the mutation patterns of *PTEN* and  
568 found one pattern as the classic OG mutation pattern with most substitutions in p.R130 (63). In DORGE,  
569 further updates can quantify the dual-functional roles (i.e. the relative chance of being TSGs or OGs) of  
570 dual-functional genes.

571 While we have already found dozens of non-mutational features that contribute significantly to the  
572 predictive power of DORGE, many CGC genes remain undetected by DORGE (Fig. 2G and H). A  
573 possible reason is the missingness of other factors or mechanisms that regulate cancer driver genes.  
574 Fortunately, the continual increase in functional genetic and epigenetic data will provide a lasting  
575 opportunity to improve and fine-tune cancer driver gene prediction methods. In future studies, we can  
576 perform lineage-specific rather than pan-cancer prediction and extend DORGE to predicting long non-  
577 coding genes, as many features used in DORGE are not restricted to protein-coding genes. In addition,  
578 further work is needed for a better understanding of the reasons underlying the phenomena such as ancient  
579 phyletic ages of cancer driver genes and enrichment of cancer driver genes at PPI and gene-drug network  
580 hubs.

581  
582 In summary, this study highlights the integration of epigenetic data to achieve a more comprehensive  
583 prediction of cancer driver genes. DORGE will serve as an essential resource for cancer biology,  
584 particularly in the development of targeted therapeutics and personalized medicine for cancer treatment.

585  
586

## 587 **Materials and Methods**

### 588 **Experimental Design**

589 In this paper, we propose DORGE, a machine-learning framework incorporating a large number of  
590 features to discover TSGs/OGs (Fig. S2). First, we used CGC v.87 genes and NGs as the training genes to  
591 predict TSGs and OGs separately from 75 candidate features by logistic regression with the elastic net  
592 penalty, and the resulting two classifiers are DORGE-TSG and DORGE-OG. Next, we used five-fold  
593 cross-validation to evaluate DORGE. We also analyzed the benefit of introducing epigenetic features  
594 based on KEGG enrichment and evaluated DORGE based on several genomic and functional genomic  
595 datasets. Lastly, we showed the enrichment of dual-functional genes predicted by DORGE in hub genes in  
596 PPI and gene-compound networks.

### 597 **Gene annotation**

598 All gene annotations, genomic and functional genomic datasets were downloaded from hg19 genome  
599 version or processed to hg19 if from other genome versions. Genome version conversion was done using  
600 the LiftOver program (<https://genome.ucsc.edu/cgi-bin/hgLiftOver>). HUGO Gene Nomenclature  
601 Committee (HGNC) annotation (<https://www.genenames.org/>) was used for gene annotation. The gene  
602 annotation can be found in the Data file S1. Promoters were defined as the regions from the upstream  
603 1,000 bp to downstream 500 bp of Transcription Start Sites (TSSs), while gene-body regions were defined  
604 as the regions from downstream 500 bp of TSSs to Transcription Termination Sites (TTSs).

### 605 **Datasets used in this study**

606 **Somatic mutation datasets.** The somatic mutation dataset used in this study was derived from the TCGA  
607 (6) website (<https://portal.gdc.cancer.gov/>) and the Catalogue Of Somatic Mutations in Cancer (COSMIC),  
608 v86 (5). These two datasets were combined to help increase the mutational information of infrequently  
609 mutated genes. Duplicate tumor samples present in more than one dataset were excluded. The final dataset  
610 used for the calculation of mutation-related features contained 5,700,484 mutations from more than 30  
611 tumor types. Hypermutated tumor samples with >2,000 mutations were excluded from this dataset. The  
612 population genetic dataset for evaluating features, such as loss-of-function (LoF) intolerance, was  
613 downloaded from The Genome Aggregation Database (gnomAD)  
614 ([https://storage.googleapis.com/gnomad-](https://storage.googleapis.com/gnomad-public/release/2.1.1/constraint/gnomad.v2.1.1.lof_metrics.by_gene.txt.bgz)  
615 [public/release/2.1.1/constraint/gnomad.v2.1.1.lof\\_metrics.by\\_gene.txt.bgz](https://storage.googleapis.com/gnomad-public/release/2.1.1/constraint/gnomad.v2.1.1.lof_metrics.by_gene.txt.bgz)) (64). Additional details  
616 regarding features calculation can be found in the Data file S1.

617 **Epigenetic datasets.** We downloaded all peak BED files (hg19) for tri-methylation on histone H3 lysine 4  
618 (H3K4me3) and other representative histone modifications from the ENCODE project  
619 (<https://www.encodeproject.org/>). The full file names and download links are listed in the Data file S1.  
620 The gene-body canyon annotation file (65), including DNA methylation information, was obtained from a  
621 previous study (21), which were based on TCGA whole-genome bisulfite sequencing (WGBS) data. The  
622 data for calculating promoter and gene-body cancer-normal methylation difference was also downloaded  
623 from the level 3 methylation data from the COSMIC website (v.90). Repli-seq BAM datasets were  
624 downloaded from the ENCODE project website, and the featureCounts program  
625 (<http://subread.sourceforge.net/>) was used to assign BAM reads to gene-bodies. Read counts were  
626 normalized based on the sequencing depth of the BAM files, and the normalized read numbers were used  
627 to calculate the replication timing S50 score (66). This score, which determines the median replication  
628 timing, was calculated by a tool available from a previous study (66). The super enhancer annotation was  
629 downloaded from the dbSUPER database (23).

630 **Other datasets.** The level 3 TCGA data, which includes the processed somatic copy number alteration  
631 (CNA) and gene expression data, were downloaded from the COSMIC website (v.90) and used without  
632 processing. The processed cell proliferation (dependency) scores from 436 CRISPR-treated cell line  
633 samples were obtained from the DepMap website (Avana-17Q2-Public\_v2) (24). For each gene, gene

634 expression was aggregated across samples to obtain the median Z score. The phastCons scores were  
635 downloaded from the UCSC (<http://hgdownload.cse.ucsc.edu/goldenPath/hg19/phastCons46way/>). The  
636 dataset including the gene damage index (GDI), Primate  $dN/dS$  score, Residual Variation Intolerance  
637 Scores (RVIS) percentile, non-coding Residual Variation Intolerance Scores (ncRVIS), non-coding  
638 Genomic Evolutionary Rate Profiling (ncGERP), family member count and gene age features were  
639 downloaded from <https://github.com/RausellLab/NCBoost> (22). The dataset is gene-centric, and no  
640 further processing was done.

641

### 642 **Curation of TSG, OG, and NG training sets**

643 The training set contained 242 high-confidence TSGs and 240 high-confidence OGs without overlapping  
644 from the v.87 CGC database on the COSMIC website, as well as 4,058 NGs obtained as follows. The  
645 initial set of NGs was obtained from Davoli *et al.* (9). However, this initial set is likely to include  
646 mislabeled genes. To address this, those that overlap with the following gene lists (June 18, 2020) were  
647 excluded from this initial NG set: (I) Candidate Cancer Gene Database (67), (II) CancerMine (32), (III) a  
648 cancer gene list compiled by Chiu *et al.* (68), (IV) the genes (OncoScore > 21.09) in OncoScore database  
649 (69), and (V) allOnco Cancer Gene List (v3 Feb 2017; <http://www.bushmanlab.org/links/genelists>). The  
650 final training gene sets are available at Data file S2.

651

### 652 **Candidate mutational features**

653 The candidate mutational features were previously defined by Davoli *et al.* (9) and Tokheim *et al.* (7). In  
654 addition to these features, other gene-centric features were also collected. Features were categorized into  
655 the following classes: ‘Genomics’, ‘Mutation’, ‘Epigenetics’ and ‘Phenotype’, and additional details  
656 regarding these features can be found in Data file S1. The feature IDs mentioned below correspond to  
657 Data file S1.

658 Features 1–20 were quantified based on the combined mutation data using the script provided by Davoli *et al.*  
659 *et al.* (9). Further information for these features can be found in their paper (9). For features 1, 5, and 6 in  
660 Data file S1 that quantify the density of different categories of mutations within genes, only the coding  
661 sequence (CDS) length (per kb) of each gene is considered. For mutational features 8–15 and 28 that  
662 include ratios, a pseudo count estimated as the median of each feature across all genes was added, as  
663 described by Davoli *et al.* (9).

664 Features 11–15 rely on the functional effects of missense mutations, including high functional impact  
665 (HiFI) or low functional impact (LoFI) (9). The PolyPhen-2 Hum-Var prediction model was used to  
666 estimate the functional effects of missense mutations and to classify them as either high functional impact  
667 (HiFI) or low functional impact (LoFI) (9), based on the probability of functional damage as estimated by  
668 the PolyPhen-2 HumVar algorithm. Features based on HiFI and LoFI include: 1) benign mutations: silent  
669 and LoFI missense mutations; 2) LoF mutations: nonsense and frameshift mutations; and 3) HiFI missense  
670 mutations (damaging missense mutations). PolyPhen-2 scores (Feature 16) were calculated by the  
671 PolyPhen-2 web server (<http://genetics.bwh.harvard.edu/pph2/>) (70). The missense MGAentropy scores  
672 (Feature 33), which also measure the multi-species conservation of missense mutation sites, were also  
673 calculated by the CRAVAT tool (71).

674 Other mutation types include splicing/total mutations (Feature 19) and inactivating fraction (Feature 27).  
675 Splicing mutations are those that affect splicing sites; >95% of splicing mutations are in the first two  
676 positions at donor or acceptor sites. Inactivating mutations include indel frameshift, splice site, translation  
677 start site, and nonstop mutations. Features 21–29 that were introduced in Tokheim *et al.*’s paper were  
678 quantified based on our revised version of the script provided by Davoli *et al.* (9), given that these features  
679 can be quantified in a similar way to that for Features 1–20. The lost start and stop fraction (Feature 26)  
680 was defined as the fraction of the translation start site, and nonstop mutations in total mutations. The  
681 recurrent missense fraction (Feature 23) was defined by missense mutations occurring more than one  
682 patient sample.

683 Features 42–46 are population genetics-based mutational features. For LoF constraints, three categories of  
684 tolerance to LoF mutations were defined by gnomAD: null (LoF mutations are fully tolerant), recessive  
685 (heterozygous LoF mutations are tolerant), and haploinsufficient (heterozygous LoF mutations are  
686 intolerant). The probability of the three types of mutations can also be obtained from the dataset (Features  
687 42–43), or be derived based on simple calculation (Sum of the probability of three categories of  
688 intolerance equals one). A probability of being LoF intolerant (pLI) score was initially introduced to  
689 determine the likelihood that a given gene is intolerant of LoF mutations. The difference between LoF o/e  
690 and pLI is explained at [https://blog.limbus-medtec.com/how-to-use-gnomad-v2-1-for-variant-filtering-  
691 d7d2a7ee710a](https://blog.limbus-medtec.com/how-to-use-gnomad-v2-1-for-variant-filtering-d7d2a7ee710a). For synonymous, missense, and LoF mutations (Features 44–46), a signed Z score to  
692 describe the deviation of observation from expectation (o/e) was obtained from the gnomAD dataset.  
693 Higher Z scores indicate intolerance to variation or increased constraint, whereas lower Z scores indicate  
694 tolerance to variants.

### 695 **Candidate epigenetic features**

696 In addition to genetic data, epigenetic data have been shown to be associated with cancer driver genes.  
697 Here, we used the peak length and height to characterize histone modifications. We also used cancer–  
698 normal methylation difference to characterize gene promoter and gene-body methylation in cancer and  
699 normal samples. These potentially useful features (Features 39–40 and 54–75) were previously used in  
700 epigenetics studies, but to what extent these features are useful in predicting cancer driver genes are not  
701 systematically evaluated. The histone modification BED files were processed based on our previously  
702 published procedures (19). Briefly, adjacent peaks were merged when peaks are within 3-kb by the merge  
703 command from bedtools (<https://bedtools.readthedocs.io/>). Peaks overlapping with the longest transcript  
704 of a gene at least 50% of peak length were assigned to that gene by bedmap function in the BEDOPS tool  
705 (<https://bedops.readthedocs.io/>) with the following parameters: --max-element --echo --fraction-map 0.5 --  
706 delim '\t' --skip-unmapped. Features of “Mean peak length” were calculated based on the merged peaks.  
707 For features of “height of peaks”, the maximum signal values (7th column in BED 6+4 narrow peak files  
708 used in ENCODE) were used. Promoter and gene-body cancer–normal methylation difference features  
709 (Features 39 and 40) were defined by the mean methylation level in cancer samples (Beta Value column  
710 in the dataset) minus that in normal samples (Avg Beta Value Normal column in the dataset) based on  
711 COSMIC 450K methylation data. 450K probes were mapped to genes according to genomic coordinates  
712 (hg19). The gene-body canyon cancer/normal methylation ratio feature (Feature 41) was inspired from a  
713 previous study (21). The ratio value was determined by the mean methylation level in cancer samples  
714 divided by that in normal samples in TCGA WGBS methylation data. To make “Gene-body cancer–  
715 normal methylation difference” (Feature 40) and “Gene-body canyon cancer/normal methylation ratio”  
716 (Feature 41) available to all genes, genes without applicable feature values were imputed as 0. Genes were  
717 linked to gene-body canyons by BEDOPS with the same parameters as shown above. The difference  
718 between Feature 40 and 41 is that Feature 41 is only available to genes with gene-body methylation  
719 canyons defined by a previous study using TCGA WGBS data (21), while Feature 40 is available for all  
720 genes with 450K probes. We previously used TCGA WGBS data to define Feature 41 because WGBS  
721 methylation data has a significantly higher resolution than 450K methylation data, while we were unable  
722 to identify large DNA methylation canyons using COSMIC 450K data. For feature 34, Repli-seq BAM  
723 datasets were quantified by the featureCounts program (<http://subread.sourceforge.net/>) to assign BAM  
724 reads to gene-bodies. Read counts were normalized based on the sequencing depth of the BAM files, and  
725 the normalized read numbers were used to calculate the S50 score (66). Early replication timing (Feature  
726 34) was quantified by the S50 score. All bam data are assigned to different cell cycle stages (G1, S1, S2,  
727 S3 and S4) for the S50 score calculation. This score, which determines the median replication timing  
728 (from 0–1), was calculated based on the algorithm proposed by a previous study (66). A S50 score that  
729 closes to 0 means early replication timing, whereas a S50 score that closes to 1 means late replication  
730 timing. Super enhancer percentage (Feature 38) was calculated as the percentage of cell lines in which  
731 super enhancers are associated with any transcripts of genes.



## 732 **Other candidate features**

733 Feature 29 (log gene length) was defined as the  $\log_2$  transformed length of the maximum transcript of a  
734 specific gene based on the ENSEMBL GTF annotation file. Feature 30 (log CDS length) was obtained  
735 from the COSMIC mutation files and supplemented by the ENSEMBL GTF annotation file, and then  $\log_2$   
736 transformed. Features 31 is CNA deletion percentage which was calculated based on column 17 (Mut  
737 Type: gain or loss) in the original dataset (CNA amplification percentage can be calculated by  $1 - \text{CNA}$   
738 deletion percentage). The Variant Effect Scoring Tool (VEST) scores (Feature 35), which indicate  
739 missense pathogenicity for each mutation, were calculated by CRAVAT. Gene expression Z score  
740 (Feature 36) was used to quantify the gene expression based on the “Regulation” column in the original  
741 data. The exon conservation (phastCons) score (Feature 32) that is based on the average phastCons score  
742 for maximum transcripts of genes was also calculated by CRAVAT. Feature 37 (Increase of cell  
743 proliferation by CRISPR Knock-down) was calculated based on the cell proliferation scores in the  
744 CRISPR screening data. A lower cell proliferation for a gene in a cell line means that the gene is more  
745 likely to essential to the cell line. A score of 0 means nonessential, whereas a score of -1 means essential.

746 Features 47–53 are evolution-based features, including GDI (Mutational damage that has accumulated in  
747 the general population), Primate  $dN/dS$  score (Ratio between the number of nonsynonymous substitutions  
748 and the number of synonymous substitutions), RVIS percentile (High RVIS percentiles reflect genes  
749 highly tolerant to variation), ncRVIS, ncGERP, family member count (Number of human paralogs for  
750 each gene), and the gene age (Time of evolutionary origin based on the presence/absence of orthologs in  
751 vertebrates). Genes with higher GERP scores are more constrained. ncRVIS is a measure of deviation  
752 from the genome-wide variants found in non-coding sequences of genes (46). A negative ncRVIS score  
753 indicates less common non-coding variation than predicted. In ncRVIS and ncGERP, the non-coding  
754 regions were defined as the untranslated regions (UTRs) as well as non-exonic 250 bp upstream of TSSs.  
755

## 756 **Training of DORGE-TSG and DORGE-OG**

757 The elastic net is a penalized regression method that can select a limited number of features that contribute  
758 to the response. Similar to the lasso, the elastic net selects features by shrinking some of the coefficients to  
759 be zero; the remaining features with nonzero coefficients are considered to have larger effects on the  
760 response and thus are selected and kept in the model. The main advantage of the elastic net over the lasso  
761 is that in case of collinearity the elastic net simultaneously selects a group of colinear features whereas the  
762 lasso tends to select only one feature from the group. (The simultaneous selection of collinear features is  
763 desired because, in the extreme situation where these collinear features are exactly identical, the  
764 regression method should assign equal coefficients to these features.) Therefore, we chose the elastic net  
765 over the lasso because we observed high collinearity among the original list of 75 features.  
766

767 Specific to DORGE, we used logistic regression with the elastic net penalty to train two binary classifiers  
768 for predicting TSGs and OGs, and these classifiers were referred to as DORGE-TSG and DORGE-OG.  
769 We used the R function glmnet from the R package glmnet ([https://cran.r-](https://cran.r-project.org/web/packages/glmnet/index.html)  
770 [project.org/web/packages/glmnet/index.html](https://cran.r-project.org/web/packages/glmnet/index.html)). The  $\lambda$  tuning parameter was selected by 5-fold cross-  
771 validation using the function cv.glmnet from the same R package, while the  $\alpha$  parameter, which balances  
772 the lasso and ridge penalties, was set to the default value 0.5.  
773

774 For every gene, DORGE-TSG predicted it with a probability of being a TSG, and this probability is  
775 defined as the gene’s TSG-score. The OG-scores are defined similarly by DORGE-OG for all genes.  
776 Having two separate binary classifiers, one for detecting TSG and the other for detecting OG, DORGE is  
777 able to detect dual-functional genes.  
778

779 The codes for training DORGE-TSG and DORGE-OG and obtaining predicted TSGs and OGs is available  
780 at <https://github.com/biocq/DORGE>. An online video that explains the code is available at  
781 <https://www.youtube.com/watch?v=Pk8ZqoHK8zk>.

782

### 783 **Precision-Recall Curve analyses**

784 Precision-recall curve (PRC) analyses were performed using the R PRROC. The AUPRCs were calculated  
785 using TSG-scores and OG-scores by the `pr.curve` function in the package.

786

### 787 **Thresholds on TSG-scores and OG-scores**

788 We used in-house code available in our DORGE GitHub repository to find the cutoffs on TSG-scores and  
789 OG-scores such that the population false positive rates (type I errors; for TSG prediction, the false positive  
790 rate is the conditional probability of misclassifying an NG as a TSG) were controlled under 1%. The code  
791 was an implementation of the Neyman-Pearson classification umbrella algorithm (25).

792

### 793 **Gene sets, genomic and functional genomic datasets used for characterization and evaluation of** 794 **DORGE-predicted novel TSGs and OGs**

795 The gene lists and datasets that we used to evaluate our DORGE-predicted novel TSGs/OGs are as  
796 follows: (I) CGC gold-standard gene list. The CGC is a widely used gold-standard list of cancer-related  
797 genes. We used the CGC v.87 gene list as the testing gene set while excluding those in v.77 CGC gene list  
798 to evaluate the performance of our prediction. (II) ATAC-Seq data. ATAC-Seq data were taken from pan-  
799 cancer peak calls from Data S2 in Corces et al.'s paper (39). (III) Epigenetic regulators (ERs). The ER  
800 gene list comes from a recent study focused on the characterization of ERs (40) and the EpiFactors  
801 database (72), after removing the genes that function only as TFs. (IV) Candidate TSGs identified by  
802 Sleeping Beauty insertional mutagenesis. The inactivating pattern gene list was downloaded from the  
803 Sleeping Beauty Cancer Driver Database (SBCDDDB) (42). This database contains cancer driver genes that  
804 were identified by Sleeping Beauty insertional mutagenesis in tumor models. For the evaluation of  
805 DORGE-predicted novel TSGs, only genes with an inactivating pattern in the SBCDDDB were kept,  
806 resulting in 1,211 genes. (V) Survival data. Survival data were downloaded from OncoLnc website (44).  
807 (VI) shRNA screening data. The gene-centric shRNA screening data (v2.4.5) were taken from the  
808 Achilles project (43). (VII) Evolutionary conservation data. For evolutionary conservation, we used  
809 phyloP scores that measure non-neutral substitution rates based on multi-species alignments. The phyloP  
810 data were downloaded from the University of California, Santa Cruz (UCSC);  
811 <http://hgdownload.cse.ucsc.edu/goldenPath/hg19/phyloP46way>). We computed the average  $-\log(\text{phyloP})$   
812 and phastCons score for each gene by averaging the base-pair-level conservation values for every position  
813 in each gene. (VIII) Phyletic age. We downloaded the precomputed phyletic age gene lists in human and  
814 measured enrichment of our predicted genes within the gene sets from different phyletic ages (i.e.,  
815 Eukaryota, Metazoa, Chordata, and Mammalia) from the Online GEne Essentiality (OGEE) database (48).  
816 (IX) The BioGRID v3.5.183 data were downloaded from the website, <https://thebiogrid.org/>. Biological  
817 network related metrics can be calculated by the Cytoscape software (73). Additional information on the  
818 network metrics can be found in the Supplementary Text. (X) The PharmacDB (74) gene-drug network  
819 data were downloaded from <https://pharmacodb.pmgenomics.ca/>. (XI) Housekeeping genes (HKGs). We  
820 downloaded an HKG gene list from <https://www.tau.ac.il/~elieis/HKG/>, which includes 3,804 HKGs. (XII)  
821 Essential genes. The essential and nonessential gene lists were also downloaded from the OGEE database.  
822 To shorten this list, we limited our essential gene set to those with  $>2$  in entries of the OGEE database,  
823 resulting in 2,340 definitive essential genes. Non-essential genes that overlap with essential genes were  
824 removed, resulting in 11,990 non-essential genes. (XIII) The drug response data were downloaded from  
825 Drug Gene Budger (54). Only significant drug-gene relationships ( $Q$ -value  $< 0.05$  and fold-change  $> 2$ )  
826 were selected from the CRowd Extracted Expression of Differential Signatures (CREEDS) data  
827 collections downloaded from the Drug Gene Budger (DGB) database (54).

828

829 **Gene-set enrichment analysis**

830 Kyoto Encyclopedia of Genes and Genomes (KEGG) enrichment analyses were performed using Enrichr  
831 (75) for DORGE and DORGE variant predicted novel genes.

832

833 **Protein-protein interaction network module analysis**

834 For DORGE-predicted novel genes and CGC genes, PPI module analysis was performed by Metascape  
835 (76). Networks contain proteins that display physical interactions with at least one other protein in the list.  
836 For networks containing 3 to 500 proteins, the Molecular Complex Detection (MCODE) algorithm (77)  
837 was applied to identify densely connected network modules.

838

839 **Statistical Analysis**

840 One-sided Wilcoxon rank-sum test was used when comparing different categories of genes. Gene  
841 enrichment analyses were performed in R, using one-sided Fisher's exact test (fisher.test function in R).  
842 P-values of Spearman correlation were calculated by Test for Association/Correlation Between Paired  
843 Samples (cor.test function in R). Binomial test was used to test the enrichment of dual-functional genes in  
844 network hub genes.

845

846 **References and Notes**

847

- 848 1. V. Labi, M. Erlacher, How cell death shapes cancer. *Cell Death Dis* **6**, e1675 (2015).
- 849 2. B. Vogelstein, N. Papadopoulos, V. E. Velculescu, S. Zhou, L. A. Diaz, Jr., K. W. Kinzler, Cancer  
850 genome landscapes. *Science* **339**, 1546-1558 (2013).
- 851 3. E. Y. Lee, W. J. Muller, Oncogenes and tumor suppressor genes. *Cold Spring Harb Perspect Biol* **2**,  
852 a003236 (2010).
- 853 4. F. M. Behan, F. Iorio, G. Picco, E. Goncalves, C. M. Beaver, G. Migliardi, R. Santos, Y. Rao, F.  
854 Sassi, M. Pinnelli, R. Ansari, S. Harper, D. A. Jackson, R. McRae, R. Pooley, P. Wilkinson, D. van  
855 der Meer, D. Dow, C. Buser-Doepner, A. Bertotti, L. Trusolino, E. A. Stronach, J. Saez-Rodriguez,  
856 K. Yusa, M. J. Garnett, Prioritization of cancer therapeutic targets using CRISPR-Cas9 screens.  
857 *Nature* **568**, 511-516 (2019).
- 858 5. S. A. Forbes, D. Beare, N. Bindal, S. Bamford, S. Ward, C. G. Cole, M. Jia, C. Kok, H. Boutselakis,  
859 T. De, Z. Sondka, L. Ponting, R. Stefancsik, B. Harsha, J. Tate, E. Dawson, S. Thompson, H. Jubb,  
860 P. J. Campbell, COSMIC: High-Resolution Cancer Genetics Using the Catalogue of Somatic  
861 Mutations in Cancer. *Curr Protoc Hum Genet* **91**, 10 11 11-10 11 37 (2016).
- 862 6. K. Tomczak, P. Czerwinska, M. Wiznerowicz, The Cancer Genome Atlas (TCGA): an  
863 immeasurable source of knowledge. *Contemp Oncol (Pozn)* **19**, A68-77 (2015).
- 864 7. C. J. Tokheim, N. Papadopoulos, K. W. Kinzler, B. Vogelstein, R. Karchin, Evaluating the  
865 evaluation of cancer driver genes. *Proc Natl Acad Sci U S A* **113**, 14330-14335 (2016).
- 866 8. M. H. Bailey, C. Tokheim, E. Porta-Pardo, S. Sengupta, D. Bertrand, A. Weerasinghe, A. Colaprico,  
867 M. C. Wendl, J. Kim, B. Reardon, P. K. Ng, K. J. Jeong, S. Cao, Z. Wang, J. Gao, Q. Gao, F. Wang,  
868 E. M. Liu, L. Mularoni, C. Rubio-Perez, N. Nagarajan, I. Cortes-Ciriano, D. C. Zhou, W. W. Liang,  
869 J. M. Hess, V. D. Yellapantula, D. Tamborero, A. Gonzalez-Perez, C. Suphavitai, J. Y. Ko, E.  
870 Khurana, P. J. Park, E. M. Van Allen, H. Liang, M. C. W. Group, N. Cancer Genome Atlas  
871 Research, M. S. Lawrence, A. Godzik, N. Lopez-Bigas, J. Stuart, D. Wheeler, G. Getz, K. Chen, A.  
872 J. Lazar, G. B. Mills, R. Karchin, L. Ding, Comprehensive Characterization of Cancer Driver Genes  
873 and Mutations. *Cell* **173**, 371-385 e318 (2018).
- 874 9. T. Davoli, A. W. Xu, K. E. Mengwasser, L. M. Sack, J. C. Yoon, P. J. Park, S. J. Elledge,  
875 Cumulative haploinsufficiency and triplosensitivity drive aneuploidy patterns and shape the cancer  
876 genome. *Cell* **155**, 948-962 (2013).

- 877 10. M. Hofree, H. Carter, J. F. Kreisberg, S. Bandyopadhyay, P. S. Mischel, S. Friend, T. Ideker,  
878 Challenges in identifying cancer genes by analysis of exome sequencing data. *Nat Commun* **7**,  
879 12096 (2016).
- 880 11. S. D. Bailey, K. Desai, K. J. Kron, P. Mazrooei, N. A. Sinnott-Armstrong, A. E. Treloar, M. Dowar,  
881 K. L. Thu, D. W. Cescon, J. Silvester, S. Y. Yang, X. Wu, R. C. Pezo, B. Haibe-Kains, T. W. Mak,  
882 P. L. Bedard, T. J. Pugh, R. C. Sallari, M. Lupien, Noncoding somatic and inherited single-  
883 nucleotide variants converge to promote ESR1 expression in breast cancer. *Nat Genet* **48**, 1260-  
884 1266 (2016).
- 885 12. S. C. Mack, H. Witt, R. M. Piro, L. Gu, S. Zuyderduyn, A. M. Stutz, X. Wang, M. Gallo, L. Garzia,  
886 K. Zayne, X. Zhang, V. Ramaswamy, N. Jager, D. T. Jones, M. Sill, T. J. Pugh, M. Ryzhova, K. M.  
887 Wani, D. J. Shih, R. Head, M. Remke, S. D. Bailey, T. Zichner, C. C. Faria, M. Barszczyk, S. Stark,  
888 H. Seker-Cin, S. Hutter, P. Johann, S. Bender, V. Hovestadt, T. Tzaridis, A. M. Dubuc, P. A.  
889 Northcott, J. Peacock, K. C. Bertrand, S. Agnihotri, F. M. Cavalli, I. Clarke, K. Nethery-Broxx, C. L.  
890 Creasy, S. K. Verma, J. Koster, X. Wu, Y. Yao, T. Milde, P. Sin-Chan, J. Zuccaro, L. Lau, S.  
891 Pereira, P. Castelo-Branco, M. Hirst, M. A. Marra, S. S. Roberts, D. Fults, L. Massimi, Y. J. Cho, T.  
892 Van Meter, W. Grajkowska, B. Lach, A. E. Kulozik, A. von Deimling, O. Witt, S. W. Scherer, X.  
893 Fan, K. M. Muraszko, M. Kool, S. L. Pomeroy, N. Gupta, J. Phillips, A. Huang, U. Tabori, C.  
894 Hawkins, D. Malkin, P. N. Kongkham, W. A. Weiss, N. Jabado, J. T. Rutka, E. Bouffet, J. O.  
895 Korbel, M. Lupien, K. D. Aldape, G. D. Bader, R. Eils, P. Lichter, P. B. Dirks, S. M. Pfister, A.  
896 Korshunov, M. D. Taylor, Epigenomic alterations define lethal CIMP-positive ependymomas of  
897 infancy. *Nature* **506**, 445-450 (2014).
- 898 13. S. M. Lauberth, T. Nakayama, X. Wu, A. L. Ferris, Z. Tang, S. H. Hughes, R. G. Roeder, H3K4me3  
899 interactions with TAF3 regulate preinitiation complex assembly and selective gene activation. *Cell*  
900 **152**, 1021-1036 (2013).
- 901 14. X. D. Zhao, X. Han, J. L. Chew, J. Liu, K. P. Chiu, A. Choo, Y. L. Orlov, W. K. Sung, A. Shahab,  
902 V. A. Kuznetsov, G. Bourque, S. Oh, Y. Ruan, H. H. Ng, C. L. Wei, Whole-genome mapping of  
903 histone H3 Lys4 and 27 trimethylations reveals distinct genomic compartments in human embryonic  
904 stem cells. *Cell Stem Cell* **1**, 286-298 (2007).
- 905 15. M. J. Ziller, H. Gu, F. Muller, J. Donaghey, L. T. Tsai, O. Kohlbacher, P. L. De Jager, E. D. Rosen,  
906 D. A. Bennett, B. E. Bernstein, A. Gnirke, A. Meissner, Charting a dynamic DNA methylation  
907 landscape of the human genome. *Nature* **500**, 477-481 (2013).
- 908 16. Y. Bergman, H. Cedar, DNA methylation dynamics in health and disease. *Nature structural &*  
909 *molecular biology* **20**, 274-281 (2013).
- 910 17. J. G. Herman, S. B. Baylin, Gene silencing in cancer in association with promoter hypermethylation.  
911 *N Engl J Med* **349**, 2042-2054 (2003).
- 912 18. R. Lister, M. Pelizzola, R. H. Dowen, R. D. Hawkins, G. Hon, J. Tonti-Filippini, J. R. Nery, L. Lee,  
913 Z. Ye, Q. M. Ngo, L. Edsall, J. Antosiewicz-Bourget, R. Stewart, V. Ruotti, A. H. Millar, J. A.  
914 Thomson, B. Ren, J. R. Ecker, Human DNA methylomes at base resolution show widespread  
915 epigenomic differences. *Nature* **462**, 315-322 (2009).
- 916 19. K. Chen, Z. Chen, D. Wu, L. Zhang, X. Lin, J. Su, B. Rodriguez, Y. Xi, Z. Xia, X. Chen, X. Shi, Q.  
917 Wang, W. Li, Broad H3K4me3 is associated with increased transcription elongation and enhancer  
918 activity at tumor-suppressor genes. *Nat Genet* **47**, 1149-1157 (2015).
- 919 20. C. A. Davis, B. C. Hitz, C. A. Sloan, E. T. Chan, J. M. Davidson, I. Gabdank, J. A. Hilton, K. Jain,  
920 U. K. Baymuradov, A. K. Narayanan, K. C. Onate, K. Graham, S. R. Miyasato, T. R. Dreszer, J. S.  
921 Strattan, O. Jolanki, F. Y. Tanaka, J. M. Cherry, The Encyclopedia of DNA elements (ENCODE):  
922 data portal update. *Nucleic Acids Res* **46**, D794-D801 (2018).
- 923 21. J. Su, Y. H. Huang, X. Cui, X. Wang, X. Zhang, Y. Lei, J. Xu, X. Lin, K. Chen, J. Lv, M. A.  
924 Goodell, W. Li, Homeobox oncogene activation by pan-cancer DNA hypermethylation. *Genome*  
925 *Biol* **19**, 108 (2018).



- 926 22. B. Caron, Y. Luo, A. Rausell, NCBoost classifies pathogenic non-coding variants in Mendelian  
927 diseases through supervised learning on purifying selection signals in humans. *Genome Biol* **20**, 32  
928 (2019).
- 929 23. A. Khan, X. Zhang, dbSUPER: a database of super-enhancers in mouse and human genome. *Nucleic  
930 Acids Res* **44**, D164-171 (2016).
- 931 24. A. Tsherniak, F. Vazquez, P. G. Montgomery, B. A. Weir, G. Kryukov, G. S. Cowley, S. Gill, W. F.  
932 Harrington, S. Pantel, J. M. Krill-Burger, R. M. Meyers, L. Ali, A. Goodale, Y. Lee, G. Jiang, J.  
933 Hsiao, W. F. J. Gerath, S. Howell, E. Merkel, M. Ghandi, L. A. Garraway, D. E. Root, T. R. Golub,  
934 J. S. Boehm, W. C. Hahn, Defining a Cancer Dependency Map. *Cell* **170**, 564-576 e516 (2017).
- 935 25. X. Tong, Y. Feng, J. J. Li, Neyman-Pearson classification algorithms and NP receiver operating  
936 characteristics. *Sci Adv* **4**, eaao1659 (2018).
- 937 26. D. Hnisz, B. J. Abraham, T. I. Lee, A. Lau, V. Saint-Andre, A. A. Sigova, H. A. Hoke, R. A. Young,  
938 Super-enhancers in the control of cell identity and disease. *Cell* **155**, 934-947 (2013).
- 939 27. M. G. Guenther, S. S. Levine, L. A. Boyer, R. Jaenisch, R. A. Young, A chromatin landmark and  
940 transcription initiation at most promoters in human cells. *Cell* **130**, 77-88 (2007).
- 941 28. C. R. Vakoc, M. M. Sachdeva, H. Wang, G. A. Blobel, Profile of histone lysine methylation across  
942 transcribed mammalian chromatin. *Mol Cell Biol* **26**, 9185-9195 (2006).
- 943 29. L. A. Gates, J. Shi, A. D. Rohira, Q. Feng, B. Zhu, M. T. Bedford, C. A. Sagum, S. Y. Jung, J. Qin,  
944 M. J. Tsai, S. Y. Tsai, W. Li, C. E. Foulds, B. W. O'Malley, Acetylation on histone H3 lysine 9  
945 mediates a switch from transcription initiation to elongation. *J Biol Chem* **292**, 14456-14472 (2017).
- 946 30. M. Zhao, P. Kim, R. Mitra, J. Zhao, Z. Zhao, TSGene 2.0: an updated literature-based  
947 knowledgebase for tumor suppressor genes. *Nucleic Acids Res* **44**, D1023-1031 (2016).
- 948 31. Y. Liu, J. Sun, M. Zhao, ONGene: A literature-based database for human oncogenes. *J Genet  
949 Genomics* **44**, 119-121 (2017).
- 950 32. J. Lever, E. Y. Zhao, J. Grewal, M. R. Jones, S. J. M. Jones, CancerMine: a literature-mined  
951 resource for drivers, oncogenes and tumor suppressors in cancer. *Nat Methods* **16**, 505-507 (2019).
- 952 33. R. D. Kumar, A. C. Searleman, S. J. Swamidass, O. L. Griffith, R. Bose, Statistically identifying  
953 tumor suppressors and oncogenes from pan-cancer genome-sequencing data. *Bioinformatics* **31**,  
954 3561-3568 (2015).
- 955 34. A. Gonzalez-Perez, N. Lopez-Bigas, Functional impact bias reveals cancer drivers. *Nucleic Acids  
956 Res* **40**, e169 (2012).
- 957 35. N. D. Dees, Q. Zhang, C. Kandoth, M. C. Wendl, W. Schierding, D. C. Koboldt, T. B. Mooney, M.  
958 B. Callaway, D. Dooling, E. R. Mardis, R. K. Wilson, L. Ding, MuSiC: identifying mutational  
959 significance in cancer genomes. *Genome Res* **22**, 1589-1598 (2012).
- 960 36. F. Dietlein, D. Weghorn, A. Taylor-Weiner, A. Richters, B. Reardon, D. Liu, E. S. Lander, E. M.  
961 Van Allen, S. R. Sunyaev, Identification of cancer driver genes based on nucleotide context. *Nat  
962 Genet* **52**, 208-218 (2020).
- 963 37. D. Chakravarty, J. Gao, S. M. Phillips, R. Kundra, H. Zhang, J. Wang, J. E. Rudolph, R. Yaeger, T.  
964 Soumerai, M. H. Nissan, M. T. Chang, S. Chandarlapaty, T. A. Traina, P. K. Paik, A. L. Ho, F. M.  
965 Hantash, A. Grupe, S. S. Baxi, M. K. Callahan, A. Snyder, P. Chi, D. Danila, M. Gounder, J. J.  
966 Harding, M. D. Hellmann, G. Iyer, Y. Janjigian, T. Kaley, D. A. Levine, M. Lowery, A. Omuro, M.  
967 A. Postow, D. Rathkopf, A. N. Shoushtari, N. Shukla, M. Voss, E. Paraiso, A. Zehir, M. F. Berger,  
968 B. S. Taylor, L. B. Saltz, G. J. Riely, M. Ladanyi, D. M. Hyman, J. Baselga, P. Sabbatini, D. B. Solit,  
969 N. Schultz, OncoKB: A Precision Oncology Knowledge Base. *JCO Precis Oncol* **2017**, (2017).
- 970 38. S. S. Dhar, D. Zhao, T. Lin, B. Gu, K. Pal, S. J. Wu, H. Alam, J. Lv, K. Yun, V. Gopalakrishnan, E.  
971 R. Flores, P. A. Northcott, V. Rajaram, W. Li, A. Shilatifard, R. V. Sillitoe, K. Chen, M. G. Lee,  
972 MLL4 Is Required to Maintain Broad H3K4me3 Peaks and Super-Enhancers at Tumor Suppressor  
973 Genes. *Mol Cell* **70**, 825-841 e826 (2018).
- 974 39. M. R. Corces, J. M. Granja, S. Shams, B. H. Louie, J. A. Seoane, W. Zhou, T. C. Silva, C.  
975 Groeneveld, C. K. Wong, S. W. Cho, A. T. Satpathy, M. R. Mumbach, K. A. Hoadley, A. G.

- 976 Robertson, N. C. Sheffield, I. Felau, M. A. A. Castro, B. P. Berman, L. M. Staudt, J. C. Zenklusen,  
977 P. W. Laird, C. Curtis, N. Cancer Genome Atlas Analysis, W. J. Greenleaf, H. Y. Chang, The  
978 chromatin accessibility landscape of primary human cancers. *Science* **362**, (2018).
- 979 40. L. Boukas, J. M. Havrilla, P. F. Hickey, A. R. Quinlan, H. T. Bjornsson, K. D. Hansen,  
980 Coexpression patterns define epigenetic regulators associated with neurological dysfunction.  
981 *Genome Res* **29**, 532-542 (2019).
- 982 41. F. Gnad, S. Doll, G. Manning, D. Arnott, Z. Zhang, Bioinformatics analysis of thousands of TCGA  
983 tumors to determine the involvement of epigenetic regulators in human cancer. *BMC Genomics* **16**  
984 **Suppl 8**, S5 (2015).
- 985 42. J. Y. Newberg, K. M. Mann, M. B. Mann, N. A. Jenkins, N. G. Copeland, SBCDDb: Sleeping  
986 Beauty Cancer Driver Database for gene discovery in mouse models of human cancers. *Nucleic*  
987 *Acids Res* **46**, D1011-D1017 (2018).
- 988 43. G. S. Cowley, B. A. Weir, F. Vazquez, P. Tamayo, J. A. Scott, S. Rusin, A. East-Seletsky, L. D. Ali,  
989 W. F. Gerath, S. E. Pantel, P. H. Lizotte, G. Jiang, J. Hsiao, A. Tsherniak, E. Dwinell, S. Aoyama,  
990 M. Okamoto, W. Harrington, E. Gelfand, T. M. Green, M. J. Tomko, S. Gopal, T. C. Wong, H. Li, S.  
991 Howell, N. Stransky, T. Liefeld, D. Jang, J. Bistline, B. Hill Meyers, S. A. Armstrong, K. C.  
992 Anderson, K. Stegmaier, M. Reich, D. Pellman, J. S. Boehm, J. P. Mesirov, T. R. Golub, D. E. Root,  
993 W. C. Hahn, Parallel genome-scale loss of function screens in 216 cancer cell lines for the  
994 identification of context-specific genetic dependencies. *Sci Data* **1**, 140035 (2014).
- 995 44. J. Anaya, OncoRank: A pan-cancer method of combining survival correlations and its application to  
996 mRNAs, miRNAs, and lncRNAs. *PeerJ Preprints* **4**, e2574v2571 (2016).
- 997 45. L. Liu, Y. Chang, T. Yang, D. P. Noren, B. Long, S. Kornblau, A. Qutub, J. Ye, Evolution-informed  
998 modeling improves outcome prediction for cancers. *Evol Appl* **10**, 68-76 (2017).
- 999 46. S. Petrovski, A. B. Gussow, Q. Wang, M. Halvorsen, Y. Han, W. H. Weir, A. S. Allen, D. B.  
1000 Goldstein, The Intolerance of Regulatory Sequence to Genetic Variation Predicts Gene Dosage  
1001 Sensitivity. *PLoS Genet* **11**, e1005492 (2015).
- 1002 47. K. W. Kinzler, B. Vogelstein, Cancer-susceptibility genes. Gatekeepers and caretakers. *Nature* **386**,  
1003 761, 763 (1997).
- 1004 48. W. H. Chen, G. Lu, X. Chen, X. M. Zhao, P. Bork, OGEE v2: an update of the online gene  
1005 essentiality database with special focus on differentially essential genes in human cancer cell lines.  
1006 *Nucleic Acids Res* **45**, D940-D944 (2017).
- 1007 49. A. A. Makashov, S. V. Malov, A. P. Kozlov, Oncogenes, tumor suppressor and differentiation genes  
1008 represent the oldest human gene classes and evolve concurrently. *Sci Rep* **9**, 16410 (2019).
- 1009 50. C. Cava, G. Bertoli, A. Colaprico, C. Olsen, G. Bontempi, I. Castiglioni, Integration of multiple  
1010 networks and pathways identifies cancer driver genes in pan-cancer analysis. *BMC Genomics* **19**, 25  
1011 (2018).
- 1012 51. H. Horn, M. S. Lawrence, C. R. Chouinard, Y. Shrestha, J. X. Hu, E. Worstell, E. Shea, N. Ilic, E.  
1013 Kim, A. Kamburov, A. Kashani, W. C. Hahn, J. D. Campbell, J. S. Boehm, G. Getz, K. Lage,  
1014 NetSig: network-based discovery from cancer genomes. *Nat Methods* **15**, 61-66 (2018).
- 1015 52. D. Silverbush, S. Cristea, G. Yanovich-Arad, T. Geiger, N. Beerenwinkel, R. Sharan, Simultaneous  
1016 Integration of Multi-omics Data Improves the Identification of Cancer Driver Modules. *Cell Syst* **8**,  
1017 456-466 e455 (2019).
- 1018 53. E. Porta-Pardo, L. Garcia-Alonso, T. Hrabe, J. Dopazo, A. Godzik, A Pan-Cancer Catalogue of  
1019 Cancer Driver Protein Interaction Interfaces. *PLoS Comput Biol* **11**, e1004518 (2015).
- 1020 54. Z. Wang, E. He, K. Sani, K. M. Jagodnik, M. C. Silverstein, A. Ma'ayan, Drug Gene Budger (DGB):  
1021 an application for ranking drugs to modulate a specific gene based on transcriptomic signatures.  
1022 *Bioinformatics* **35**, 1247-1248 (2019).
- 1023 55. A. S. Reddy, S. Zhang, Polypharmacology: drug discovery for the future. *Expert Rev Clin*  
1024 *Pharmacol* **6**, 41-47 (2013).

- 1025 56. I. T. P.-C. A. o. W. G. Consortium, Pan-cancer analysis of whole genomes. *Nature* **578**, 82-93  
1026 (2020).
- 1027 57. M. S. Lawrence, P. Stojanov, P. Polak, G. V. Kryukov, K. Cibulskis, A. Sivachenko, S. L. Carter, C.  
1028 Stewart, C. H. Mermel, S. A. Roberts, A. Kiezun, P. S. Hammerman, A. McKenna, Y. Drier, L. Zou,  
1029 A. H. Ramos, T. J. Pugh, N. Stransky, E. Helman, J. Kim, C. Sougnez, L. Ambrogio, E. Nickerson,  
1030 E. Shefler, M. L. Cortes, D. Auclair, G. Saksena, D. Voet, M. Noble, D. DiCara, P. Lin, L.  
1031 Lichtenstein, D. I. Heiman, T. Fennell, M. Imielinski, B. Hernandez, E. Hodis, S. Baca, A. M. Dulak,  
1032 J. Lohr, D. A. Landau, C. J. Wu, J. Melendez-Zajgla, A. Hidalgo-Miranda, A. Koren, S. A.  
1033 McCarroll, J. Mora, B. Crompton, R. Onofrio, M. Parkin, W. Winckler, K. Ardlie, S. B. Gabriel, C.  
1034 W. M. Roberts, J. A. Biegel, K. Stegmaier, A. J. Bass, L. A. Garraway, M. Meyerson, T. R. Golub,  
1035 D. A. Gordenin, S. Sunyaev, E. S. Lander, G. Getz, Mutational heterogeneity in cancer and the  
1036 search for new cancer-associated genes. *Nature* **499**, 214-218 (2013).
- 1037 58. L. Mularoni, R. Sabarinathan, J. Deu-Pons, A. Gonzalez-Perez, N. Lopez-Bigas, OncodriveFML: a  
1038 general framework to identify coding and non-coding regions with cancer driver mutations. *Genome*  
1039 *Biol* **17**, 128 (2016).
- 1040 59. D. Tamborero, A. Gonzalez-Perez, N. Lopez-Bigas, OncodriveCLUST: exploiting the positional  
1041 clustering of somatic mutations to identify cancer genes. *Bioinformatics* **29**, 2238-2244 (2013).
- 1042 60. Z. Waks, O. Weissbrod, B. Carmeli, R. Norel, F. Utro, Y. Goldschmidt, Driver gene classification  
1043 reveals a substantial overrepresentation of tumor suppressors among very large chromatin-regulating  
1044 proteins. *Sci Rep* **6**, 38988 (2016).
- 1045 61. J. Reimand, G. D. Bader, Systematic analysis of somatic mutations in phosphorylation signaling  
1046 predicts novel cancer drivers. *Mol Syst Biol* **9**, 637 (2013).
- 1047 62. A. A. Stepanenko, Y. S. Vassetzky, V. M. Kavsan, Antagonistic functional duality of cancer genes.  
1048 *Gene* **529**, 199-207 (2013).
- 1049 63. I. N. Smith, J. M. Briggs, Structural mutation analysis of PTEN and its genotype-phenotype  
1050 correlations in endometriosis and cancer. *Proteins* **84**, 1625-1643 (2016).
- 1051 64. M. Lek, K. J. Karczewski, E. V. Minikel, K. E. Samocha, E. Banks, T. Fennell, A. H. O'Donnell-  
1052 Luria, J. S. Ware, A. J. Hill, B. B. Cummings, T. Tukiainen, D. P. Birnbaum, J. A. Kosmicki, L. E.  
1053 Duncan, K. Estrada, F. Zhao, J. Zou, E. Pierce-Hoffman, J. Berghout, D. N. Cooper, N. Deflaux, M.  
1054 DePristo, R. Do, J. Flannick, M. Fromer, L. Gauthier, J. Goldstein, N. Gupta, D. Howrigan, A.  
1055 Kiezun, M. I. Kurki, A. L. Moonshine, P. Natarajan, L. Orozco, G. M. Peloso, R. Poplin, M. A.  
1056 Rivas, V. Ruano-Rubio, S. A. Rose, D. M. Ruderfer, K. Shakir, P. D. Stenson, C. Stevens, B. P.  
1057 Thomas, G. Tiao, M. T. Tusie-Luna, B. Weisburd, H. H. Won, D. Yu, D. M. Altshuler, D. Ardissino,  
1058 M. Boehnke, J. Danesh, S. Donnelly, R. Elosua, J. C. Florez, S. B. Gabriel, G. Getz, S. J. Glatt, C.  
1059 M. Hultman, S. Kathiresan, M. Laakso, S. McCarroll, M. I. McCarthy, D. McGovern, R. McPherson,  
1060 B. M. Neale, A. Palotie, S. M. Purcell, D. Saleheen, J. M. Scharf, P. Sklar, P. F. Sullivan, J.  
1061 Tuomilehto, M. T. Tsuang, H. C. Watkins, J. G. Wilson, M. J. Daly, D. G. MacArthur, C. Exome  
1062 Aggregation, Analysis of protein-coding genetic variation in 60,706 humans. *Nature* **536**, 285-291  
1063 (2016).
- 1064 65. M. Jeong, D. Sun, M. Luo, Y. Huang, G. A. Challen, B. Rodriguez, X. Zhang, L. Chavez, H. Wang,  
1065 R. Hannah, S. B. Kim, L. Yang, M. Ko, R. Chen, B. Gottgens, J. S. Lee, P. Gunaratne, L. A. Godley,  
1066 G. J. Darlington, A. Rao, W. Li, M. A. Goodell, Large conserved domains of low DNA methylation  
1067 maintained by Dnmt3a. *Nat Genet* **46**, 17-23 (2014).
- 1068 66. C. L. Chen, A. Rappailles, L. Duquenne, M. Huvet, G. Guilbaud, L. Farinelli, B. Audit, Y.  
1069 d'Aubenton-Carafa, A. Arneodo, O. Hyrien, C. Thermes, Impact of replication timing on non-CpG  
1070 and CpG substitution rates in mammalian genomes. *Genome Res* **20**, 447-457 (2010).
- 1071 67. K. L. Abbott, E. T. Nyre, J. Abrahante, Y. Y. Ho, R. Isaksson Vogel, T. K. Starr, The Candidate  
1072 Cancer Gene Database: a database of cancer driver genes from forward genetic screens in mice.  
1073 *Nucleic Acids Res* **43**, D844-848 (2015).

- 1074 68. H. S. Chiu, S. Somvanshi, E. Patel, T. W. Chen, V. P. Singh, B. Zorman, S. L. Patil, Y. Pan, S. S.  
1075 Chatterjee, N. Cancer Genome Atlas Research, A. K. Sood, P. H. Gunaratne, P. Sumazin, Pan-  
1076 Cancer Analysis of lncRNA Regulation Supports Their Targeting of Cancer Genes in Each Tumor  
1077 Context. *Cell Rep* **23**, 297-312 e212 (2018).
- 1078 69. R. Piazza, D. Ramazzotti, R. Spinelli, A. Pirola, L. De Sano, P. Ferrari, V. Magistroni, N. Cordani,  
1079 N. Sharma, C. Gambacorti-Passerini, OncoScore: a novel, Internet-based tool to assess the  
1080 oncogenic potential of genes. *Sci Rep* **7**, 46290 (2017).
- 1081 70. I. Adzhubei, D. M. Jordan, S. R. Sunyaev, Predicting functional effect of human missense mutations  
1082 using PolyPhen-2. *Curr Protoc Hum Genet* **Chapter 7**, Unit7 20 (2013).
- 1083 71. D. L. Masica, C. Douville, C. Tokheim, R. Bhattacharya, R. Kim, K. Moad, M. C. Ryan, R. Karchin,  
1084 CRAVAT 4: Cancer-Related Analysis of Variants Toolkit. *Cancer Res* **77**, e35-e38 (2017).
- 1085 72. Y. A. Medvedeva, A. Lennartsson, R. Ehsani, I. V. Kulakovskiy, I. E. Vorontsov, P. Panahandeh, G.  
1086 Khimulya, T. Kasukawa, F. Consortium, F. Drablos, EpiFactors: a comprehensive database of  
1087 human epigenetic factors and complexes. *Database (Oxford)* **2015**, bav067 (2015).
- 1088 73. P. Shannon, A. Markiel, O. Ozier, N. S. Baliga, J. T. Wang, D. Ramage, N. Amin, B. Schwikowski,  
1089 T. Ideker, Cytoscape: a software environment for integrated models of biomolecular interaction  
1090 networks. *Genome Res* **13**, 2498-2504 (2003).
- 1091 74. P. Smirnov, V. Kofia, A. Maru, M. Freeman, C. Ho, N. El-Hachem, G. A. Adam, W. Ba-Alawi, Z.  
1092 Safikhani, B. Haibe-Kains, PharmacoDB: an integrative database for mining in vitro anticancer drug  
1093 screening studies. *Nucleic Acids Res* **46**, D994-D1002 (2018).
- 1094 75. M. V. Kuleshov, M. R. Jones, A. D. Rouillard, N. F. Fernandez, Q. Duan, Z. Wang, S. Koplev, S. L.  
1095 Jenkins, K. M. Jagodnik, A. Lachmann, M. G. McDermott, C. D. Monteiro, G. W. Gundersen, A.  
1096 Ma'ayan, Enrichr: a comprehensive gene set enrichment analysis web server 2016 update. *Nucleic*  
1097 *Acids Res* **44**, W90-97 (2016).
- 1098 76. Y. Zhou, B. Zhou, L. Pache, M. Chang, A. H. Khodabakhshi, O. Tanaseichuk, C. Benner, S. K.  
1099 Chanda, Metascape provides a biologist-oriented resource for the analysis of systems-level datasets.  
1100 *Nat Commun* **10**, 1523 (2019).
- 1101 77. G. D. Bader, C. W. Hogue, An automated method for finding molecular complexes in large protein  
1102 interaction networks. *BMC Bioinformatics* **4**, 2 (2003).
- 1103 78. P. Chandrashekar, N. Ahmadinejad, J. Wang, A. Sekulic, J. B. Egan, Y. W. Asmann, S. Kumar, C.  
1104 Maley, L. Liu, Somatic selection distinguishes oncogenes and tumor suppressor genes.  
1105 *Bioinformatics* **36**, 1712-1717 (2020).
- 1106  
1107

## 1108 Acknowledgments

1109  
1110 **Acknowledgments:** We would like to thank potential reviewers for their insightful suggestions and  
1111 comments on this paper. **Funding:** This work was supported by grants from the US National Institutes of  
1112 Health (NIH) R01HG007538, R01CA193466 and R01CA228140 to W.L.. NIH R01GM120507, National  
1113 Science Foundation grant DBI-1846216, Sloan Research Fellowship, Johnson & Johnson WiSTEM2D  
1114 Award, and UCLA DGSOM W. M. Keck Foundation Junior Faculty Award to J.J.L. **Author**  
1115 **contributions:** Conceptualization: W.L., J.L. and J.J.L.; methodology: J.J.L. and J.L.; software: J.J.L. and  
1116 J.L.; writing: J.J.L., J.L., Y.C., X.G. and W.L.; data analysis: J.L., J.J.L., J.S., F.P. and X.G.; supervision:  
1117 W.L. and J.J.L. **Competing interests:** The authors declare no competing financial interests. **Data and**  
1118 **materials availability:** The open source codes for DORGE are freely available at  
1119 <https://github.com/biocq/DORGE> or upon request, along with the data and scripts to reproduce the results  
1120 of the paper.

1121

## 1122 Figures and Tables

1123



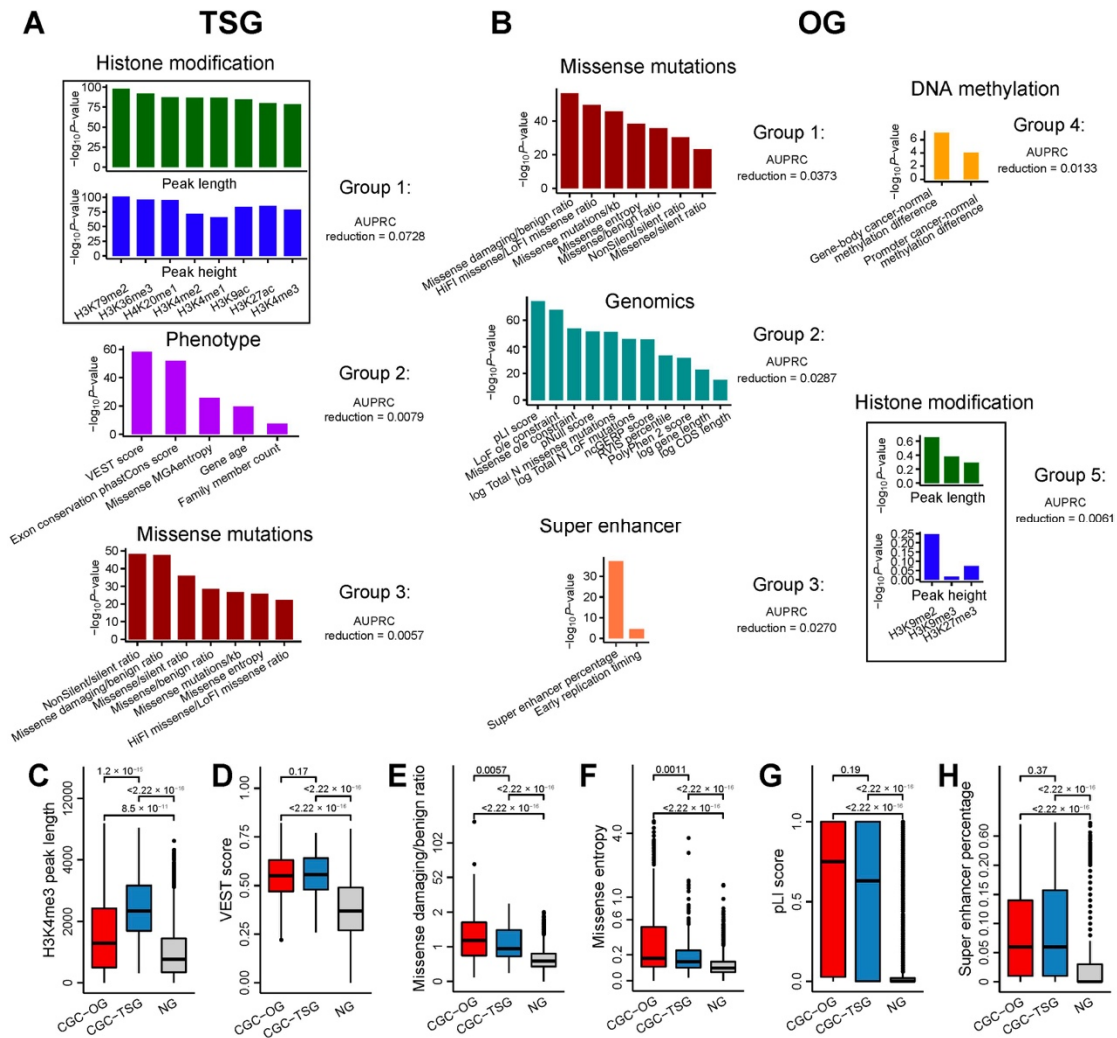

**Fig. 1. Features that discriminate tumor suppressor genes (TSGs) from oncogenes (OGs).** (A), Feature groups selected for TSGs. (B), Features groups selected for OGs. Feature groups are sorted according to the AUPRC reduction in elastic net five-fold cross-validation. Feature groups are named according to the representative features. Box plots showing the distribution of (C), Tri-methylation on histone H3 lysine 4 (H3K4me3) mean peak length, (D), Variant Effect Scoring Tool (VEST) score, (E), Missense damaging/benign ratio, (F), Missense entropy, (G) pLI score and (H), Super enhancer percentage for the CGC-OG, CGC-TSG, and NG sets. Genes as both TSGs and OGs are excluded. *P*-values for the differences between the TSGs/OGs and NGs were calculated by the one-sided “greater-than” Wilcoxon rank-sum test.

1124  
1125  
1126  
1127  
1128  
1129  
1130  
1131  
1132  
1133  
1134

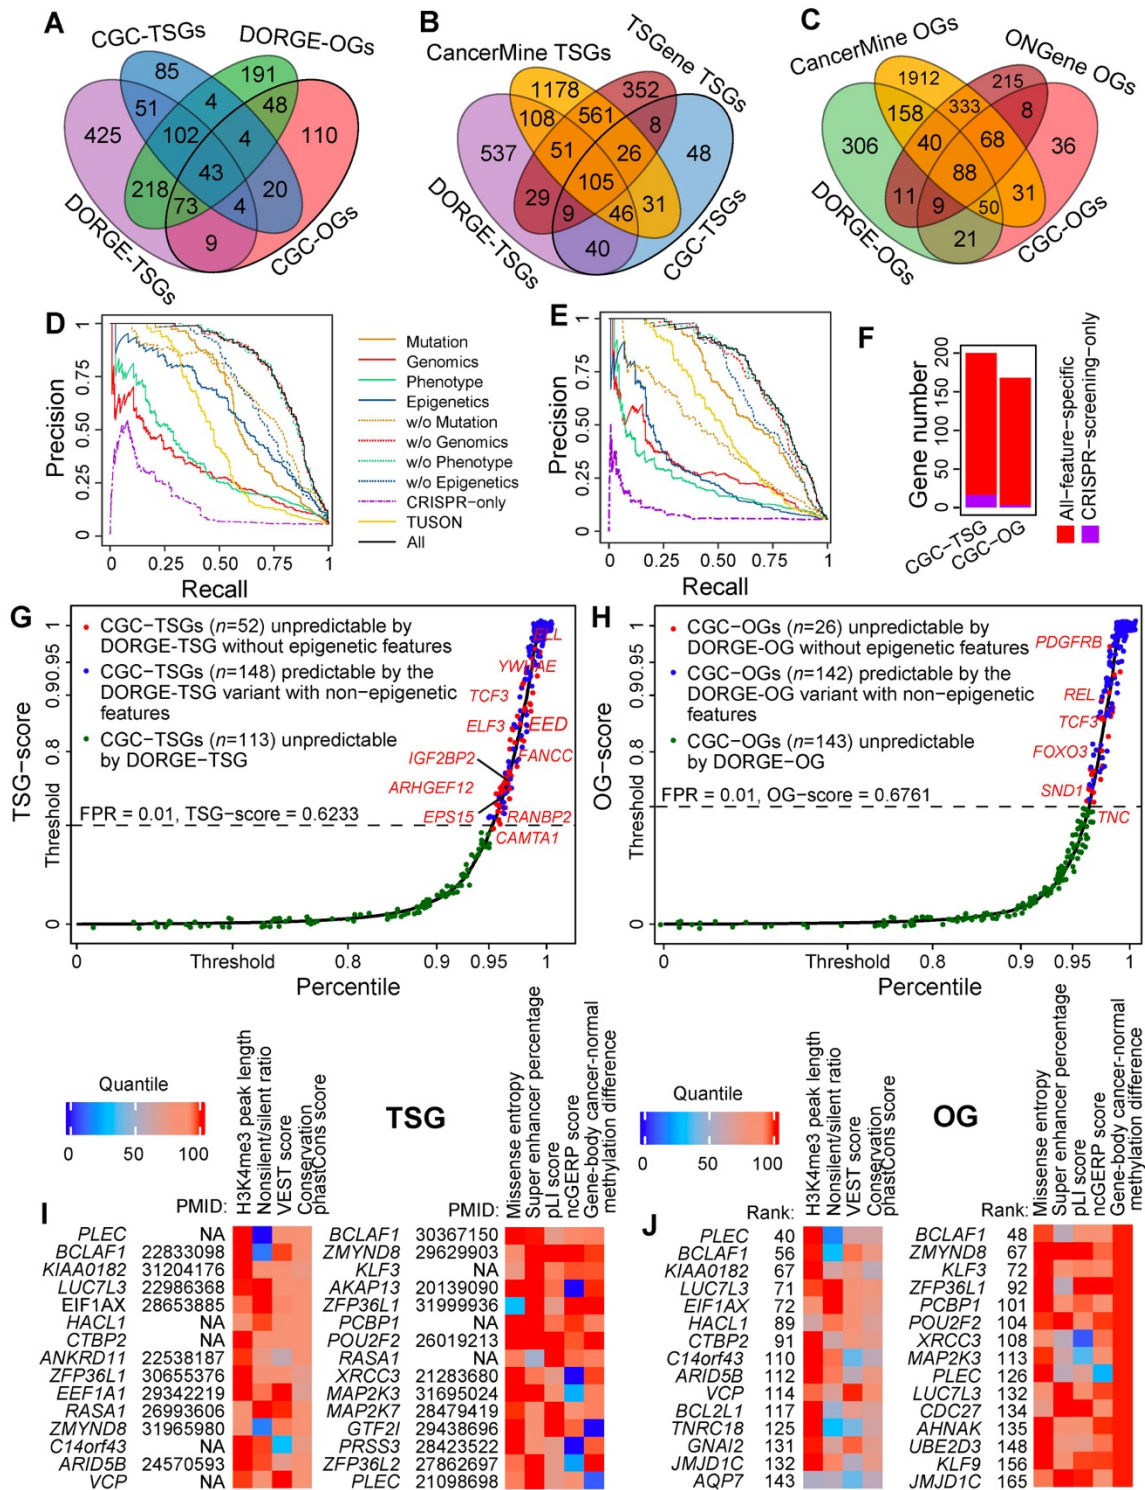

**Fig. 2. Evaluation of the DORGE method and characterization of the DORGE-predicted novel TSGs and OGs.** Venn diagrams showing the overlap (A), between DORGE-predicted novel TSGs/OGs and CGC-TSGs/OGs. (B), between DORGE-predicted novel TSGs, CGC-TSGs, CancerMine-TSGs, and TSGene database-TSGs. (C), between DORGE-predicted novel OGs, CGC-OGs, CancerMine-OGs, and ONGene database-OGs. Precision-recall curves (PRCs) for (D), TSG and (E), OG prediction. Different lines represent different PRCs from DORGE or DORGE variants. (F), Stacked bar plots showing the number of rediscovered CGC-TSGs and CGC-OGs using all features compared to CRISPR-screening data only. Cumulative distribution function (CDF) plots of DORGE-predicted TSG-scores (G) and OG-scores (H) of 19,636 human genes. X-axis and Y-axis are swapped for illustration purposes, and Y-axis is stretched to emphasize large TSG- and OG-scores. CGC genes are plotted as Jitter points to avoid

1146 overplotting. The dashed lines indicate DORGE-TSG and DORGE-OG thresholds at a target FPR of 1%,  
1147 and the CGC genes whose TSG-scores and OG scores exceed the thresholds (above the dashed lines) are  
1148 predicted as TSGs and OGs. **(I)**, Top-15 DORGE-predicted non-CGC novel TSGs (left) and OGs (right),  
1149 respectively, along with representative feature heatmaps and PubMed IDs. To make features comparable,  
1150 feature values are transformed into quantiles. **(J)**, Top-15 DORGE-predicted non-CGC novel TSGs (left)  
1151 and OGs (right) that have no documented role in cancer based on the TSGene, ONGene, and CancerMine  
1152 databases, along with representative feature heatmaps.  
1153

1154  
1155

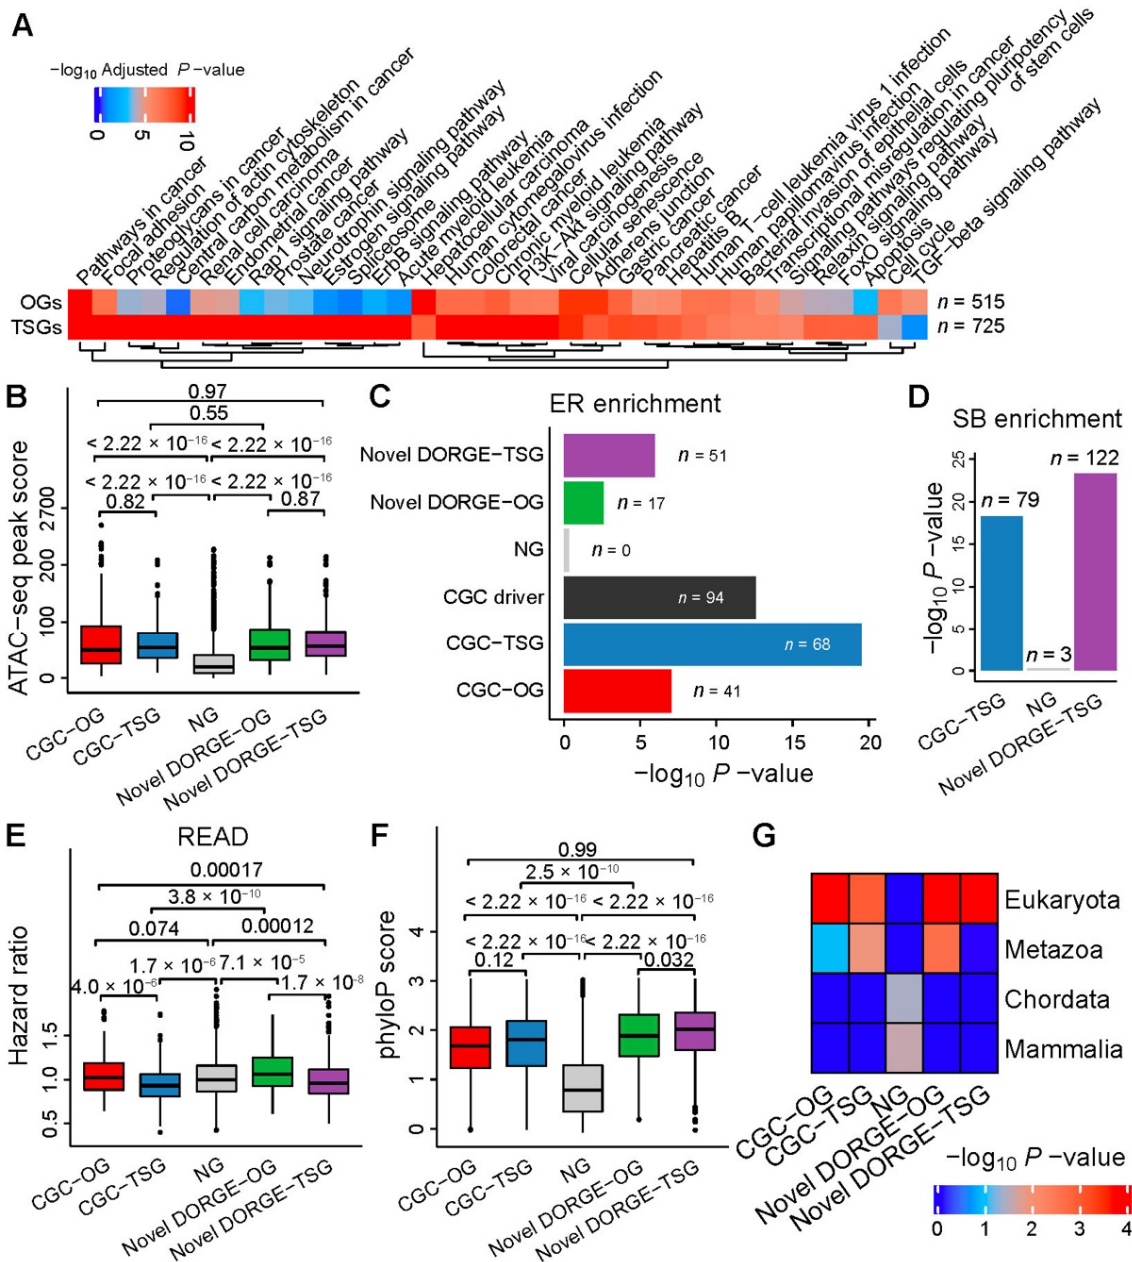

1156  
1157  
1158  
1159  
1160  
1161  
1162  
1163  
1164  
1165  
1166  
1167  
1168  
1169  
1170

**Fig. 3. Characterization and evaluation of DORGE-predicted novel TSGs/OGs by independent functional genomic and genomic datasets.** (A), Kyoto Encyclopedia of Genes and Genomes (KEGG) pathway enrichment analysis performed by Enrichr (75) for DORGE-predicted novel TSGs and OGs. Due to space limitations, terms with adjusted  $P$ -values  $< 10^{-4}$  are shown. Besides, terms with adjusted  $P$ -values  $10^8$ -fold lower for TSGs than OGs or  $10^4$ -fold lower for OGs than TSGs are also shown. (B), ATAC-seq peak score measuring open chromatin for CGC-TSGs/OGs, DORGE-predicted novel TSGs/OGs, and NGs. Enrichment heatmaps of various gene types in (C), epigenetic regulator (ER) gene list and (D), inactivating pattern gene list for Sleeping Beauty insertional mutagenesis, a screening tool for cancer driver genes. (E), Boxplot showing the Cox hazard ratio (HR) score for various gene types. Data are from Rectum adenocarcinoma (READ). (F), Boxplot showing the phyloP score for various gene types. The phyloP score measures phylogenetic conservation and represents  $-\log P$ -values under a null hypothesis of neutral evolution. PhyloP basewise conservation scores were derived from a Multiz alignment of 46 vertebrate species. (G), TSGs and OGs are enriched in genes having earlier evolutionary origin (Eukaryota).  $P$ -values for the differences between indicated gene categories were calculated by the one-



1171 sided Wilcoxon rank-sum test. In boxplots and heatmap, the Fisher's Exact Test is used to calculate *P*-  
 1172 values, and gene numbers in different gene categories are normalized to 200 to make *P*-values comparable.  
 1173 In this figure, dual-functional CGC genes were excluded from the CGC-TSGs/OGs.  
 1174

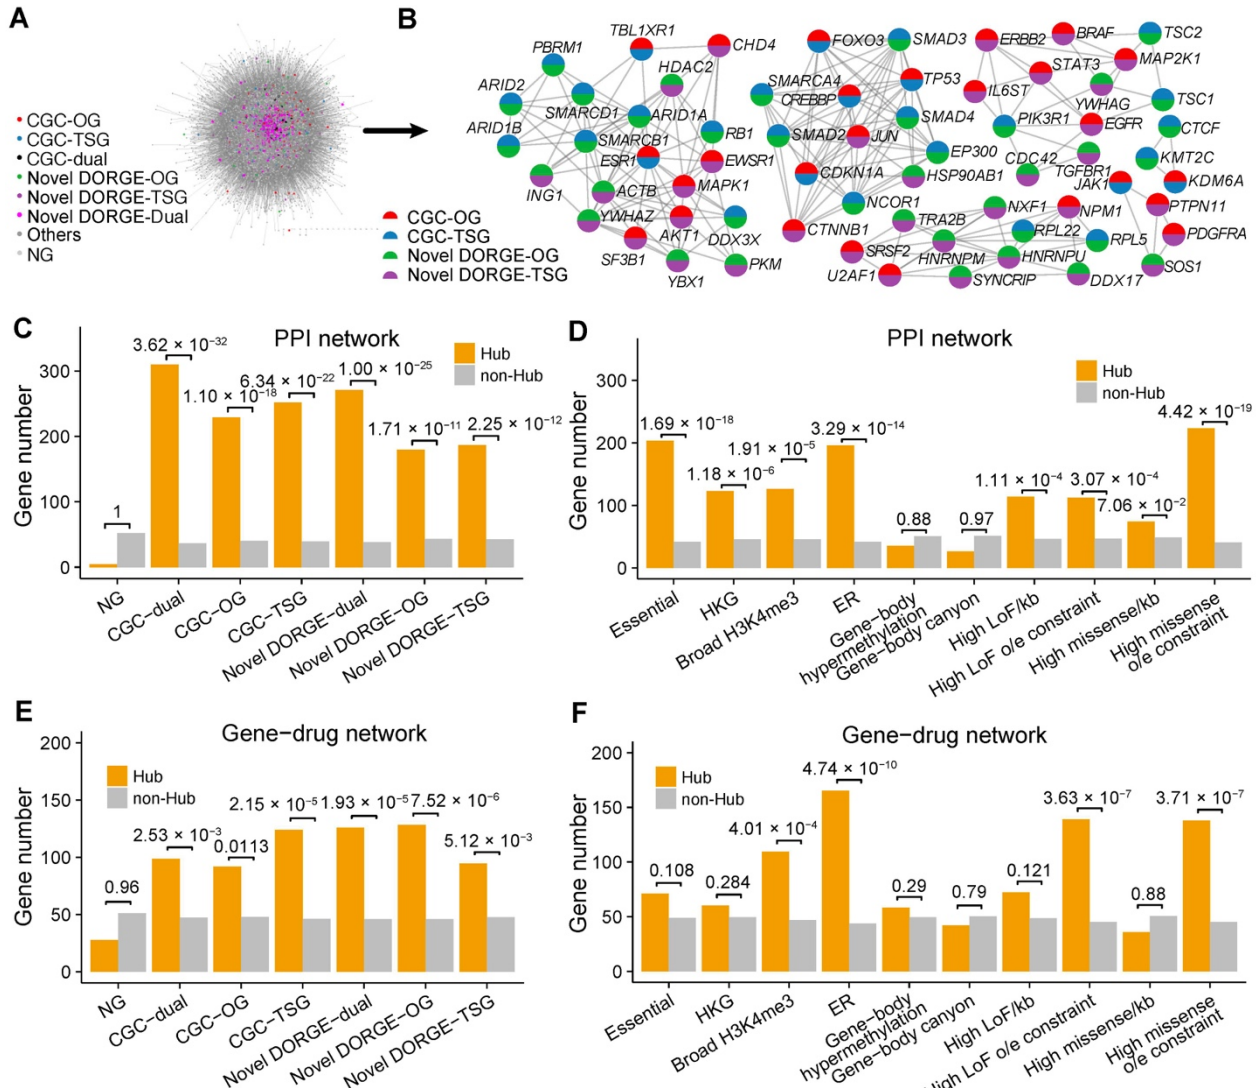

**Fig. 4. Dual-functional cancer driver genes act as backbones in BioGRID protein-protein interaction (PPI) and characterization of hub genes in PPI and PharmacoDB gene-drug networks.** (A), Complete BioGRID PPI network. (B), The Molecular Complex Detection (MCODE) algorithm was applied to DORGE-predicted novel TSGs/OGs to identify densely connected network modules (or backbones). All genes in the identified network are CGC dual-functional genes or novel dual-functional genes. Gene categories are represented as pie charts, with the colors coded based on gene categories. (C), Enrichment of CGC-TSGs/OGs and DORGE-predicted novel TSGs/OGs in hub genes in BioGRID network. (D), Enrichment of various gene sets or epigenetic and mutational patterns in hub genes in BioGRID network. (E), Enrichment of CGC-TSGs/OGs and DORGE-predicted novel TSGs/OGs in hub genes in the PharmacoDB gene-drug network. (F), Enrichment of various gene sets or epigenetic and mutational features in hub genes in the PharmacoDB gene-drug network. Hub genes are defined as the genes with the top 5% highest degree in the BioGRID or PharmacoDB network. To generate comparable *P*-values, the gene number in different gene categories was normalized to 200. HKG: Housekeeping gene; Broad H3K4me3: Genes with H3K4me3 length >4,000; ER: Epigenetic Regulator. *P*-values for the differences between indicated gene categories were calculated by the right-sided Wilcoxon rank-sum test.

1175  
 1176  
 1177  
 1178  
 1179  
 1180  
 1181  
 1182  
 1183  
 1184  
 1185  
 1186  
 1187  
 1188  
 1189  
 1190  
 1191  
 1192

1193  
1194

**Table 1.** Evaluation of cancer driver genes (TSGs + OGs) prediction based on the v.87 CGC genes.

| Method              | #     | <i>Sn</i> | <i>Sp</i> | Precision | Accuracy | Algorithms                                     |
|---------------------|-------|-----------|-----------|-----------|----------|------------------------------------------------|
| DORGE               | 1,172 | 0.611     | 0.997     | 0.966     | 0.948    | Logistic regression with the elastic net model |
| OncodriveFM (34)    | 2,600 | 0.338     | 0.915     | 0.367     | 0.841    | Functional impact model                        |
| MuSIC (35)          | 1,975 | 0.331     | 0.870     | 0.272     | 0.801    | Mutational background model                    |
| MutPanning (36)     | 460   | 0.318     | 0.994     | 0.880     | 0.907    | Nucleotide context model                       |
| TUSON (9)           | 243   | 0.222     | 0.999     | 0.961     | 0.900    | <i>P</i> -value combination                    |
| OncodriveFML (58)   | 680   | 0.212     | 0.983     | 0.646     | 0.885    | Functional impact model                        |
| 20/20+ (7)          | 193   | 0.208     | 1.000     | 0.991     | 0.899    | Random Forest model                            |
| GUST (78)           | 276   | 0.206     | 0.994     | 0.838     | 0.894    | Random Forest model                            |
| MutSigCV (57)       | 158   | 0.137     | 0.998     | 0.905     | 0.888    | Mutational background model                    |
| OncodriveCLUST (59) | 586   | 0.118     | 0.963     | 0.319     | 0.855    | Mutational hotspot model                       |
| ActiveDriver (61)   | 417   | 0.098     | 0.996     | 0.771     | 0.881    | Logistic regression model                      |

1195
